# Supplementary material for: Joint profiling of gene expression and chromatin accessibility of amphioxus development at single cell resolution
Source: Research Square preprint supplement (doi:10.21203/rs.3.rs-504113/v1), 2021-05-18
Supplement: Supplementary file 1 [file 45fc406b2e35c82c95c18d45.xlsx]

## Sheet: scATAC-seq (embryos)
	Supplementary Table 3. Data summary of amphioxus embryos single cell ATAC-seqencing.
	stage_name	n_cells	qc_min_peaks	qc_max_peaks
	B	1535	600	3500
	G3	10091	1500	10000
	G6	6398	1000	15000
	N1	9703	1500	10000
	N3	5225	1500	10000
	L0	4880	1500	15000
