# Supplementary material for: Joint profiling of gene expression and chromatin accessibility of amphioxus development at single cell resolution
Source: Research Square preprint supplement (doi:10.21203/rs.3.rs-504113/v1), 2021-05-18
Supplement: Supplementary file 3 [file 5ce6b631029157bce3ddabc3.xlsx]

## Sheet: scRNA-seq (embryos)
	Table 1. Data summary of amphioxus embryos single cell RNA-sequencing.
	stage_name	n_cells	qc_min_genes	qc_max_genes	min_counts	median_counts	mean_counts	max_counts	min_genes	median_genes	mean_genes	max_genes
	2cell	988	350	3000	488	1140	1714	7546	348	685.5	685.5	2963
	4cell	954	350	3000	465	923	1325	7182	347	578.5	578.5	2891
	8cell	654	300	3000	433	903	1441	9862	299	533.5	533.5	2956
	32cell	2365	300	3000	455	1117	1951	13991	299	563	563	2982
	B	7919	400	3000	680	3179	4908	36174	398	764	764	2987
	G3	9385	350	3000	492	1057	1429	9366	349	631	631	2994
	G4	7508	250	3000	376	1751	2312	17815	250	605	605	2960
	G5	20642	150	3000	166	482	655	12831	149	259	259	2930
	G6	24383	350	3000	551	1400	1704	19809	349	496	496	2872
	N0	24417	150	3000	171	544	719	12353	149	283	283	2701
	N1	21803	150	3000	168	586	877	9652	149	350	350	2993
	N3	22253	150	3000	168	661	1093	17252	150	340	340	2983
	L0	10565	100	3000	113	440	801	18512	99	254	254	2986
