# Supplementary material for: Joint profiling of gene expression and chromatin accessibility of amphioxus development at single cell resolution
Source: Research Square preprint supplement (doi:10.21203/rs.3.rs-504113/v1), 2021-05-18
Supplement: Supplementary file 5 [file 69ae0c9aa4bdcc3ca1be657b.xlsx]

## Sheet: Supplementary Table 2
	Supplementary Table 2.List of genes specifically expressed in the unassigned lineage G3.5.
	gene	p_val	avg_logFC	pct.1	pct.2	p_val_adj	lineage	ID	anno
	bf_00018522	0	1.60255	0.685	0.145	0	E7_5.E12_1	bf_00018522	&&Similar to glmU: Bifunctional protein GlmU (Staphylococcus epidermidis (strain ATCC 12228) OX=176280)
	bf_00017156	0	1.31189	0.537	0.056	0	E7_5.E12_1	bf_00017156	&&Similar to CUZD1: CUB and zona pellucida-like domain-containing protein 1 (Homo sapiens OX=9606)
	bf_00017301	0	1.19168	0.489	0.078	0	E7_5.E12_1	bf_00017301	&H1FOO&Similar to Sperm-specific protein PHI-2B (Mytilus californianus OX=6549)
	bf_00017476	0	0.830129	0.393	0.112	0	E7_5.E12_1	bf_00017476	&AKAP1&Similar to Akap1: A-kinase anchor protein 1, mitochondrial (Mus musculus OX=10090)
	bf_00013143	0	0.801343	0.493	0.252	0	E7_5.E12_1	bf_00013143	&CCNA2,CCNA1&Similar to G2/mitotic-specific cyclin-A (Patella vulgata OX=6465)
	bf_00016288	0	0.729767	0.865	0.884	0	E7_5.E12_1	bf_00016288	&&Similar to SCRN3: Secernin-3 (Homo sapiens OX=9606)
	bf_00019574	0	0.728112	0.341	0.059	0	E7_5.E12_1	bf_00019574	&NASP&Similar to Histone-binding protein N1/N2 (Xenopus laevis OX=8355)
	bf_00006715	0	0.623497	0.391	0.228	0	E7_5.E12_1	bf_00006715	&&Similar to CENPE: Centromere-associated protein E (Homo sapiens OX=9606)
	bf_00004688	0	0.614743	0.334	0.124	0	E7_5.E12_1	bf_00004688	&KIF20A&Similar to KIF20A: Kinesin-like protein KIF20A (Bos taurus OX=9913)
	bf_00002975	0	0.61442	0.488	0.311	0	E7_5.E12_1	bf_00002975	&CCNB2,CCNB1&Similar to G2/mitotic-specific cyclin-B (Patella vulgata OX=6465)
	bf_00022197	0	0.575411	0.31	0.115	0	E7_5.E12_1	bf_00022197	&BRCA1&Similar to BRCA1: Breast cancer type 1 susceptibility protein homolog (Bos taurus OX=9913)
	bf_00013097	0	0.562677	0.295	0.077	0	E7_5.E12_1	bf_00013097	&DNMT1&Similar to DNMT1: DNA (cytosine-5)-methyltransferase 1 (Gallus gallus OX=9031)
	bf_00013155	0	0.549796	0.297	0.098	0	E7_5.E12_1	bf_00013155	&&Similar to cysS: Cysteine--tRNA ligase (Pyrobaculum calidifontis (strain JCM 11548 / VA1) OX=410359)
	bf_00002530	0	0.541522	0.325	0.17	0	E7_5.E12_1	bf_00002530	&DEK&Similar to Dek: Protein DEK (Rattus norvegicus OX=10116)
	bf_00006556	0	0.536531	0.288	0.102	0	E7_5.E12_1	bf_00006556	&&Similar to TASOR: Protein TASOR (Homo sapiens OX=9606)
	bf_00013140	0	0.535545	0.496	0.426	0	E7_5.E12_1	bf_00013140	&HMGB2,HMGB1,HMGB3&Similar to Dsp1: High mobility group protein DSP1 (Drosophila melanogaster OX=7227)
	bf_00015342	0	0.531926	0.262	0.048	0	E7_5.E12_1	bf_00015342	&ERCC6L&Similar to ercc6l: DNA excision repair protein ERCC-6-like (Danio rerio OX=7955)
	bf_00000629	0	0.509146	0.233	0.044	0	E7_5.E12_1	bf_00000629	&PHF7,G2E3&Similar to G2E3: G2/M phase-specific E3 ubiquitin-protein ligase (Homo sapiens OX=9606)
	bf_00015232	0	0.496561	0.249	0.073	0	E7_5.E12_1	bf_00015232	&RNF216&Similar to Rnf216: E3 ubiquitin-protein ligase RNF216 (Mus musculus OX=10090)
	bf_00021732	0	0.493929	0.272	0.095	0	E7_5.E12_1	bf_00021732	&RIF1&Similar to RIF1: Telomere-associated protein RIF1 (Gallus gallus OX=9031)
	bf_00013105	0	0.464572	0.336	0.223	0	E7_5.E12_1	bf_00013105	&ATRX&Similar to ATRX: Transcriptional regulator ATRX (Pan troglodytes OX=9598)
	bf_00023597	0	0.460092	0.242	0.069	0	E7_5.E12_1	bf_00023597	&&Similar to CUZD1: CUB and zona pellucida-like domain-containing protein 1 (Homo sapiens OX=9606)
	bf_00003779	0	0.444232	0.227	0.09	0	E7_5.E12_1	bf_00003779	&PLIN3,PLIN2&Similar to PLIN2: Perilipin-2 (Sus scrofa OX=9823)
	bf_00016825	0	0.434265	0.29	0.172	0	E7_5.E12_1	bf_00016825	&BAZ1B&Similar to BAZ1B: Tyrosine-protein kinase BAZ1B (Homo sapiens OX=9606)
	bf_00005591	0	0.432132	0.199	0.046	0	E7_5.E12_1	bf_00005591	&HASPIN&Similar to Haspin: Serine/threonine-protein kinase haspin (Mus musculus OX=10090)
	bf_00002097	0	0.413954	0.232	0.096	0	E7_5.E12_1	bf_00002097	&CHAF1A&Similar to chaf1a-a: Chromatin assembly factor 1 subunit A-A (Xenopus laevis OX=8355)
	bf_00006731	0	0.404055	0.225	0.118	0	E7_5.E12_1	bf_00006731	&&Similar to PF11_0240: Dynein heavy chain-like protein PF11_0240 (Plasmodium falciparum (isolate 3D7) OX=36329)
	bf_00015403	0	0.403276	0.175	0.029	0	E7_5.E12_1	bf_00015403	&&Similar to FPR4: FK506-binding protein 4 (Cryptococcus neoformans var. neoformans serotype D (strain JEC21 / ATCC MYA-565) OX=214684)
	bf_00013364	0	0.380172	0.244	0.124	0	E7_5.E12_1	bf_00013364	&RRM1&Similar to Rrm1: Ribonucleoside-diphosphate reductase large subunit (Mus musculus OX=10090)
	bf_00026404	0	0.379996	0.218	0.109	0	E7_5.E12_1	bf_00026404	&&Similar to ZFP36: mRNA decay activator protein ZFP36 (Homo sapiens OX=9606)
	bf_00010272	0	0.379881	0.278	0.201	0	E7_5.E12_1	bf_00010272	&NUGGC&Similar to Nuggc: Nuclear GTPase SLIP-GC (Mus musculus OX=10090)
	bf_00004547	0	0.36918	0.192	0.056	0	E7_5.E12_1	bf_00004547	&HELLS&Similar to HELLS: Lymphoid-specific helicase (Homo sapiens OX=9606)
	bf_00003265	0	0.357049	0.211	0.103	0	E7_5.E12_1	bf_00003265	&&Similar to ZC3H4: Zinc finger CCCH domain-containing protein 4 (Homo sapiens OX=9606)
	bf_00002797	0	0.356874	0.286	0.229	0	E7_5.E12_1	bf_00002797	&MEX3B,MEX3D,MEX3A,MEX3C&Similar to mex3b: RNA-binding protein MEX3B (Xenopus laevis OX=8355)
	bf_00023598	0	0.355636	0.195	0.068	0	E7_5.E12_1	bf_00023598	&&Similar to CUZD1: CUB and zona pellucida-like domain-containing protein 1 (Homo sapiens OX=9606)
	bf_00017187	0	0.352236	0.157	0.016	0	E7_5.E12_1	bf_00017187	&&Similar to ZP domain-containing protein (Acropora millepora OX=45264)
	bf_00001308	0	0.347841	0.165	0.039	0	E7_5.E12_1	bf_00001308	&&Similar to Ghr: Growth hormone receptor (Rattus norvegicus OX=10116)
	bf_00013401	0	0.345939	0.336	0.301	0	E7_5.E12_1	bf_00013401	&NUMA1&Similar to Numa1: Nuclear mitotic apparatus protein 1 (Mus musculus OX=10090)
	bf_00012209	0	0.339083	0.187	0.077	0	E7_5.E12_1	bf_00012209	&&Similar to GLUL: Glutamine synthetase (Canis lupus familiaris OX=9615)
	bf_00004340	0	0.337262	0.147	0.012	0	E7_5.E12_1	bf_00004340	&&Similar to notch1a: Neurogenic locus notch homolog protein 1 (Danio rerio OX=7955)
	bf_00003350	0	0.327859	0.155	0.036	0	E7_5.E12_1	bf_00003350	&STMN2,STMN3,STMN4&Similar to STMN1: Stathmin (Gallus gallus OX=9031)
	bf_00010505	0	0.326691	0.161	0.041	0	E7_5.E12_1	bf_00010505	&KIF4B,KIF4A&Similar to KIF4A: Chromosome-associated kinesin KIF4A (Homo sapiens OX=9606)
	bf_00004846	0	0.314095	0.133	0.012	0	E7_5.E12_1	bf_00004846	&TTF2&Similar to Ttf2: Transcription termination factor 2 (Mus musculus OX=10090)
	bf_00011719	0	0.307113	0.149	0.036	0	E7_5.E12_1	bf_00011719	&&Similar to Lrp2: Low-density lipoprotein receptor-related protein 2 (Rattus norvegicus OX=10116)
	bf_00001270	0	0.296637	0.129	0.017	0	E7_5.E12_1	bf_00001270	&&Similar to slx4ip: Protein SLX4IP (Danio rerio OX=7955)
	bf_00013118	0	0.283908	0.127	0.022	0	E7_5.E12_1	bf_00013118	&&Similar to cvfC: Conserved virulence factor C (Staphylococcus haemolyticus (strain JCSC1435) OX=279808)
	bf_00024119	2.677419228e-314	0.350017	0.253	0.174	6.53558033560203e-310	E7_5.E12_1	bf_00024119	&INCENP&Similar to incenp-a: Inner centromere protein A (Xenopus laevis OX=8355)
	bf_00000869	0	0.328455	0.226	0.164	5.57145e-305	E7_5.E12_1	bf_00000869	&NIN,NINL&Similar to Ninl: Ninein-like protein (Mus musculus OX=10090)
	bf_00005543	3.64458e-306	0.322399	0.193	0.102	8.89642e-302	E7_5.E12_1	bf_00005543	&EIF3A&Similar to eif3a: Eukaryotic translation initiation factor 3 subunit A (Xenopus laevis OX=8355)
	bf_00026416	1.52095e-304	0.309268	0.13	0.028	3.71264e-300	E7_5.E12_1	bf_00026416	&MLX&Similar to MLX: Max-like protein X (Homo sapiens OX=9606)
	bf_00000828	1.58778e-303	0.278145	0.122	0.021	3.87577e-299	E7_5.E12_1	bf_00000828	&DTL&Similar to DTL: Denticleless protein homolog (Gallus gallus OX=9031)
	bf_00013537	2.41092e-303	0.375617	0.227	0.132	5.88505e-299	E7_5.E12_1	bf_00013537	&BRCA2&Similar to BRCA2: Breast cancer type 2 susceptibility protein homolog (Felis catus OX=9685)
	bf_00015331	1.33415e-297	0.351747	0.231	0.151	3.25667e-293	E7_5.E12_1	bf_00015331	&CNOT3&Similar to Cnot3: CCR4-NOT transcription complex subunit 3 (Mus musculus OX=10090)
	bf_00001030	1.60865e-295	0.391198	0.259	0.163	3.92671e-291	E7_5.E12_1	bf_00001030	&ARID4B&Similar to Arid4b: AT-rich interactive domain-containing protein 4B (Rattus norvegicus OX=10116)
	bf_00010057	2.38217e-292	0.307876	0.2	0.133	5.81489e-288	E7_5.E12_1	bf_00010057	&LSM14A,LSM14B&Similar to LSM14A: Protein LSM14 homolog A (Homo sapiens OX=9606)
	bf_00000928	2.38608e-290	0.300031	0.175	0.087	5.82441e-286	E7_5.E12_1	bf_00000928	&CEP128&Similar to CEP128: Centrosomal protein of 128 kDa (Homo sapiens OX=9606)
	bf_00020610	1.52925e-289	0.28094	0.131	0.042	3.73291e-285	E7_5.E12_1	bf_00020610	&TRAIP&Similar to TRAIP: E3 ubiquitin-protein ligase TRAIP (Homo sapiens OX=9606)
	bf_00016114	4.7405e-286	0.369182	0.244	0.152	1.15716e-281	E7_5.E12_1	bf_00016114	&ATAD5&Similar to Atad5: ATPase family AAA domain-containing protein 5 (Mus musculus OX=10090)
	bf_00015337	4.74787e-286	0.263414	0.212	0.192	1.15895e-281	E7_5.E12_1	bf_00015337	&ATF7IP2&Similar to ATF7IP: Activating transcription factor 7-interacting protein 1 (Gallus gallus OX=9031)
	bf_00003045	4.34925e-282	0.329098	0.176	0.066	1.06165e-277	E7_5.E12_1	bf_00003045	&CSPP1&Similar to CSPP1: Centrosome and spindle pole-associated protein 1 (Homo sapiens OX=9606)
	bf_00000412	1.21504e-280	0.315488	0.166	0.061	2.96592e-276	E7_5.E12_1	bf_00000412	&PLCB1,PLCB3,PLCB2&Similar to PLCB3: 1-phosphatidylinositol 4,5-bisphosphate phosphodiesterase beta-3 (Homo sapiens OX=9606)
	bf_00017376	3.43657e-278	0.310635	0.165	0.065	8.38867e-274	E7_5.E12_1	bf_00017376	&GGNBP2&Similar to GGNBP2: Gametogenetin-binding protein 2 (Homo sapiens OX=9606)
	bf_00000872	2.92785e-276	0.285452	0.355	0.373	7.14687e-272	E7_5.E12_1	bf_00000872	&CENPF&Similar to CENPF: Centromere protein F (Homo sapiens OX=9606)
	bf_00022456	2.52277e-273	0.285152	0.334	0.359	6.15808e-269	E7_5.E12_1	bf_00022456	&AKAP9&Similar to Akap9: A-kinase anchor protein 9 (Mus musculus OX=10090)
	bf_00009741	2.59734e-273	0.274875	0.17	0.096	6.3401e-269	E7_5.E12_1	bf_00009741	&KIF15&Similar to KIF15: Kinesin-like protein KIF15 (Strongylocentrotus purpuratus OX=7668)
	bf_00013903	3.77386e-270	0.270065	0.138	0.045	9.212e-266	E7_5.E12_1	bf_00013903	&&Similar to Casp8ap2: CASP8-associated protein 2 (Mus musculus OX=10090)
	bf_00004287	1.23972e-264	0.250859	0.12	0.03	3.02617e-260	E7_5.E12_1	bf_00004287	&TOPBP1&Similar to topbp1-A: DNA topoisomerase 2-binding protein 1-A (Xenopus laevis OX=8355)
	bf_00019887	4.47811e-263	0.273282	0.16	0.058	1.09311e-258	E7_5.E12_1	bf_00019887	&KIF2C,KIF2A&Similar to KIF2A: Kinesin-like protein KIF2A (Gallus gallus OX=9031)
	bf_00006826	1.52446e-261	0.283105	0.152	0.061	3.7212e-257	E7_5.E12_1	bf_00006826	&CEP152&Similar to cep152: Centrosomal protein of 152 kDa (Xenopus laevis OX=8355)
	bf_00023272	3.83352e-261	0.268813	0.173	0.089	9.35763e-257	E7_5.E12_1	bf_00023272	&&Similar to NXPE3: NXPE family member 3 (Bos taurus OX=9913)
	bf_00001939	8.16612e-257	0.304407	0.169	0.09	1.99335e-252	E7_5.E12_1	bf_00001939	&RTF1&Similar to Rtf1: RNA polymerase-associated protein RTF1 homolog (Mus musculus OX=10090)
	bf_00000844	3.33358e-254	0.289407	0.133	0.034	8.13726e-250	E7_5.E12_1	bf_00000844	&ESF1&Similar to esf1: Pre-rRNA-processing protein esf1 (Schizosaccharomyces pombe (strain 972 / ATCC 24843) OX=284812)
	bf_00004246	1.4369e-251	0.286204	0.18	0.096	3.50747e-247	E7_5.E12_1	bf_00004246	&&Similar to ZNF208: Zinc finger protein 208 (Homo sapiens OX=9606)
	bf_00001203	2.68784e-251	0.299201	0.219	0.155	6.56102e-247	E7_5.E12_1	bf_00001203	&KMT2A&Similar to KMT2A: Histone-lysine N-methyltransferase 2A (Homo sapiens OX=9606)
	bf_00009322	1.18118e-250	0.256927	0.144	0.125	2.88326e-246	E7_5.E12_1	bf_00009322	&AURKA,AURKB,AURKC&Similar to AURKA: Aurora kinase A (Bos taurus OX=9913)
	bf_00023213	3.78208e-250	0.300382	0.173	0.063	9.23205e-246	E7_5.E12_1	bf_00023213	&KPNB1&Similar to KPNB1: Importin subunit beta-1 (Homo sapiens OX=9606)
	bf_00022323	7.21863e-248	0.265968	0.153	0.084	1.76207e-243	E7_5.E12_1	bf_00022323	&SENP1,SENP2&Similar to SENP1: Sentrin-specific protease 1 (Pongo abelii OX=9601)
	bf_00019591	1.33721e-245	0.293274	0.189	0.115	3.26412e-241	E7_5.E12_1	bf_00019591	&CENPC&Similar to CENPC: Centromere protein C (Homo sapiens OX=9606)
	bf_00023351	8.31801e-245	0.276094	0.161	0.091	2.03043e-240	E7_5.E12_1	bf_00023351	&ZC3H15&Similar to Zc3h15: Zinc finger CCCH domain-containing protein 15 (Rattus norvegicus OX=10116)
	bf_00005006	1.3255e-244	0.251658	0.158	0.097	3.23554e-240	E7_5.E12_1	bf_00005006	&KIF11&Similar to KIF11: Kinesin-like protein KIF11 (Homo sapiens OX=9606)
	bf_00025967	6.53075e-239	0.293714	0.172	0.094	1.59416e-234	E7_5.E12_1	bf_00025967	&EPC1&Similar to EPC1: Enhancer of polycomb homolog 1 (Homo sapiens OX=9606)
	bf_00001763	1.04587e-238	0.278763	0.156	0.087	2.55296e-234	E7_5.E12_1	bf_00001763	&MIS18BP1&Similar to Mis18bp1: Mis18-binding protein 1 (Mus musculus OX=10090)
	bf_00025978	2.53686e-238	0.273165	0.144	0.068	6.19247e-234	E7_5.E12_1	bf_00025978	&&Similar to cdv3: Protein CDV3 homolog (Xenopus tropicalis OX=8364)
	bf_00001075	5.10968e-233	0.297139	0.158	0.056	1.24727e-228	E7_5.E12_1	bf_00001075	&TRIP11&Similar to TRIP11: Thyroid receptor-interacting protein 11 (Homo sapiens OX=9606)
	bf_00005427	1.12128e-230	0.252671	0.117	0.035	2.73704e-226	E7_5.E12_1	bf_00005427	&NSRP1&Similar to nsrp1: Nuclear speckle splicing regulatory protein 1 (Danio rerio OX=7955)
	bf_00012946	1.18619e-223	0.290161	0.188	0.124	2.89549e-219	E7_5.E12_1	bf_00012946	&CHM,CHML&Similar to CHM: Rab proteins geranylgeranyltransferase component A 1 (Homo sapiens OX=9606)
	bf_00004925	5.72984e-223	0.255563	0.307	0.32	1.39866e-218	E7_5.E12_1	bf_00004925	&SMC3&Similar to SMC3: Structural maintenance of chromosomes protein 3 (Pongo abelii OX=9601)
	bf_00003643	3.65865e-219	0.260957	0.195	0.14	8.93075e-215	E7_5.E12_1	bf_00003643	&MDC1,LYPLA1,LYPLA2&Similar to LYPLA1: Acyl-protein thioesterase 1 (Bos taurus OX=9913)
	bf_00026121	5.48908e-218	0.26609	0.28	0.271	1.33988e-213	E7_5.E12_1	bf_00026121	&CBX1,CBX5,CBX3&Similar to Cbx3: Chromobox protein homolog 3 (Mus musculus OX=10090)
	bf_00000907	7.50115e-217	0.275623	0.161	0.078	1.83103e-212	E7_5.E12_1	bf_00000907	&CLSPN&Similar to Clspn: Claspin (Mus musculus OX=10090)
	bf_00020528	7.4068e-199	0.261954	0.174	0.103	1.808e-194	E7_5.E12_1	bf_00020528	&PDCD11&Similar to PDCD11: Protein RRP5 homolog (Homo sapiens OX=9606)
	bf_00023451	2.6025e-189	0.259409	0.199	0.149	6.3527e-185	E7_5.E12_1	bf_00023451	&SVIL&Similar to SVIL: Supervillin (Homo sapiens OX=9606)
	bf_00006416	2.66065e-172	0.259565	0.19	0.142	6.49465e-168	E7_5.E12_1	bf_00006416	&NOLC1&Similar to NOLC1: Nucleolar and coiled-body phosphoprotein 1 (Homo sapiens OX=9606)
