# Supplementary material for: Joint profiling of gene expression and chromatin accessibility of amphioxus development at single cell resolution
Source: Research Square preprint supplement (doi:10.21203/rs.3.rs-504113/v1), 2021-05-18
Supplement: Supplementary file 6 [file cbc208edc8c5efe4cb15e64e.xlsx]

## Sheet: Sheet1
	Supplemental Table 6. Stage specific new transcripts compared to the previous stage.
	stage	gene	p_val	avg_logFC	pct.1	pct.2	p_val_adj	gene_name	annotations
	8cell	bf_00018978	0	0.271726	1	1	0	Htr3a	&&Similar to Htr3a: 5-hydroxytryptamine receptor 3A (Mus musculus OX=10090)
	8cell	bf_00016120	3.85804e-113	0.449053	0.546	0.131	9.41747e-109	RNF151	&&Similar to RNF151: RING finger protein 151 (Bos taurus OX=9913)
	8cell	bf_00017707	3.86146e-101	0.210278	0.237	0	9.42582e-97	STYK1	&&Similar to STYK1: Tyrosine-protein kinase STYK1 (Homo sapiens OX=9606)
	8cell	bf_00014214	1.2064e-72	0.394642	0.768	0.573	2.94483e-68	argS	&&Similar to argS: Arginine--tRNA ligase (Ralstonia solanacearum (strain GMI1000) OX=267608)
	8cell	bf_00009235	4.1489e-69	0.29845	1	0.998	1.01275e-64	CLCC1	&&Similar to CLCC1: Chloride channel CLIC-like protein 1 (Homo sapiens OX=9606)
	8cell	bf_00004342	8.86189e-59	0.339466	0.521	0.228	2.16319e-54	UBE2B,UBE2A	&UBE2B,UBE2A&Similar to Ube2a: Ubiquitin-conjugating enzyme E2 A (Mus musculus OX=10090)
	8cell	bf_00018147	2.18613e-54	0.36184	0.586	0.356	5.33635e-50	POLR2A	&POLR2A&Similar to RpII215: DNA-directed RNA polymerase II subunit RPB1 (Drosophila melanogaster OX=7227)
	8cell	bf_00006661	2.2248e-46	0.360415	0.624	0.405	5.43074e-42	fhaB	&&Similar to fhaB: Filamentous hemagglutinin (Bordetella pertussis (strain Tohama I / ATCC BAA-589 / NCTC 13251) OX=257313)
	8cell	bf_00012347	2.22258e-43	0.336803	0.673	0.47	5.42532e-39	abnC	&&Similar to abnC: Arabinan endo-1,5-alpha-L-arabinosidase C (Emericella nidulans (strain FGSC A4 / ATCC 38163 / CBS 112.46 / NRRL 194 / M139) OX=227321)
	8cell	bf_00003963	1.27158e-35	0.286905	0.595	0.4	3.10394e-31	NUP50	&NUP50&Similar to Nup50: Nuclear pore complex protein Nup50 (Mus musculus OX=10090)
	8cell	bf_00015357	1.14849e-31	0.171595	0.28	0.09	2.80347e-27	CABIN1	&CABIN1&Similar to CABIN1: Calcineurin-binding protein cabin-1 (Homo sapiens OX=9606)
	8cell	bf_00023598	8.83785e-25	0.225069	0.792	0.682	2.15732e-20	CUZD1	&&Similar to CUZD1: CUB and zona pellucida-like domain-containing protein 1 (Homo sapiens OX=9606)
	8cell	bf_00010729	6.25009e-24	0.221988	0.867	0.806	1.52565e-19	IDUA	&&Similar to IDUA: Alpha-L-iduronidase (Canis lupus familiaris OX=9615)
	8cell	bf_00008310	1.4842e-20	0.167835	0.33	0.161	3.62293e-16	BAP1	&BAP1&Similar to BAP1: Ubiquitin carboxyl-terminal hydrolase BAP1 (Branchiostoma floridae OX=7739)
	8cell	bf_00020542	2.22292e-20	0.18338	0.384	0.21	5.42614e-16	CA1	&&Similar to CA1: Carbonic anhydrase 1 (Bos taurus OX=9913)
	8cell	bf_00008907	5.56033e-19	0.163024	0.312	0.159	1.35728e-14	OTUD5	&OTUD5&Similar to otud5-b: OTU domain-containing protein 5-B (Xenopus laevis OX=8355)
	8cell	bf_00009322	4.6633e-18	0.201829	0.723	0.625	1.13831e-13	AURKA,AURKB,AURKC	&AURKA,AURKB,AURKC&Similar to AURKA: Aurora kinase A (Bos taurus OX=9913)
	8cell	bf_00007727	6.90166e-18	0.179809	0.393	0.25	1.6847e-13	POP1	&POP1&Similar to POP1: Ribonucleases P/MRP protein subunit POP1 (Homo sapiens OX=9606)
	8cell	bf_00002118	5.14369e-14	0.171254	0.469	0.327	1.25557e-09	BNC2	&&Similar to BNC2: Zinc finger protein basonuclin-2 (Homo sapiens OX=9606)
	8cell	bf_00016622	3.62475e-11	0.152017	0.685	0.612	8.84801e-07	EP400,SRCAP	&EP400,SRCAP&Similar to dom: Helicase domino (Drosophila melanogaster OX=7227)
	8cell	bf_00012359	4.73473e-11	0.150558	0.506	0.384	1.15575e-06	UBN1,UBN2	&UBN1,UBN2&Similar to UBN2: Ubinuclein-2 (Homo sapiens OX=9606)
	32cell	bf_00018978	0	0.351392	1	1	0	Htr3a	&&Similar to Htr3a: 5-hydroxytryptamine receptor 3A (Mus musculus OX=10090)
	32cell	bf_00010727	6.38707021238734e-311	0.409434	1	0.998	1.55908e-306	fam135b	&&Similar to fam135b: Protein FAM135B (Xenopus laevis OX=8355)
	32cell	bf_00023598	5.50989e-182	0.410235	0.898	0.71	1.34497e-177	CUZD1	&&Similar to CUZD1: CUB and zona pellucida-like domain-containing protein 1 (Homo sapiens OX=9606)
	32cell	bf_00010247	3.36299e-162	0.274154	0.4	0.085	8.20905e-158	Thap2	&&Similar to Thap2: THAP domain-containing protein 2 (Mus musculus OX=10090)
	32cell	bf_00023597	2.28984e-129	0.336267	0.934	0.821	5.58951e-125	CUZD1	&&Similar to CUZD1: CUB and zona pellucida-like domain-containing protein 1 (Homo sapiens OX=9606)
	32cell	bf_00018541	4.02752e-119	0.197811	0.376	0.101	9.83118e-115	CA1	&&Similar to CA1: Carbonic anhydrase 1 (Bos taurus OX=9913)
	32cell	bf_00016120	2.05219e-102	0.242279	0.531	0.235	5.00939e-98	RNF151	&&Similar to RNF151: RING finger protein 151 (Bos taurus OX=9913)
	32cell	bf_00012347	6.94839e-93	0.288725	0.758	0.521	1.6961e-88	abnC	&&Similar to abnC: Arabinan endo-1,5-alpha-L-arabinosidase C (Emericella nidulans (strain FGSC A4 / ATCC 38163 / CBS 112.46 / NRRL 194 / M139) OX=227321)
	32cell	bf_00023826	1.45976e-71	0.245275	0.69	0.464	3.56328e-67	ALOX5	&&Similar to ALOX5: Arachidonate 5-lipoxygenase (Mesocricetus auratus OX=10036)
	32cell	bf_00020542	6.46602e-65	0.186614	0.487	0.254	1.57835e-60	CA1	&&Similar to CA1: Carbonic anhydrase 1 (Bos taurus OX=9913)
	32cell	bf_00016621	1.11888e-63	0.199954	0.428	0.211	2.7312e-59	Ep400	&&Similar to Ep400: E1A-binding protein p400 (Mus musculus OX=10090)
	32cell	bf_00010729	4.01698e-57	0.228169	0.918	0.822	9.80544e-53	IDUA	&&Similar to IDUA: Alpha-L-iduronidase (Canis lupus familiaris OX=9615)
	32cell	bf_00018147	1.74862e-47	0.171517	0.619	0.414	4.26839e-43	POLR2A	&POLR2A&Similar to RpII215: DNA-directed RNA polymerase II subunit RPB1 (Drosophila melanogaster OX=7227)
	32cell	bf_00017187	1.46173e-45	0.201375	0.84	0.73	3.56807e-41	ZP domain-containing protein	&&Similar to ZP domain-containing protein (Acropora millepora OX=45264)
	32cell	bf_00016288	2.19371e-23	0.223103	0.973	0.973	5.35485e-19	SCRN3	&&Similar to SCRN3: Secernin-3 (Homo sapiens OX=9606)
	B	bf_00018978	0	1.03145	1	1	0	Htr3a	&&Similar to Htr3a: 5-hydroxytryptamine receptor 3A (Mus musculus OX=10090)
	B	bf_00024014	0	0.483206	0.789	0.01	0	moody	&&Similar to moody: G-protein coupled receptor moody (Drosophila pseudoobscura pseudoobscura OX=46245)
	B	bf_00020173	4.02457e-237	0.172895	0.448	0	9.82398e-233	zgc	&&Similar to zgc:112234: Histone H2B 1/2 (Danio rerio OX=7955)
	B	bf_00020170	1.01254e-224	0.174881	0.443	0.003	2.47161e-220	Histone H1	&&Similar to Histone H1 (Tigriopus californicus OX=6832)
	B	bf_00021102	6.64296e-176	0.240655	0.375	0.005	1.62155e-171	FoxE4	FoxE4&&Similar to foxe4: Forkhead box protein E4 (Xenopus laevis OX=8355)
	B	bf_00016120	3.74806e-140	0.169824	0.562	0.156	9.14901e-136	RNF151	&&Similar to RNF151: RING finger protein 151 (Bos taurus OX=9913)
	B	bf_00010729	6.24508e-44	0.297618	0.913	0.749	1.52442e-39	IDUA	&&Similar to IDUA: Alpha-L-iduronidase (Canis lupus familiaris OX=9615)
	G3	bf_00024014	0	1.16529	0.934	0.491	0	moody	&&Similar to moody: G-protein coupled receptor moody (Drosophila pseudoobscura pseudoobscura OX=46245)
	G3	bf_00010279	0	1.16279	0.671	0.189	0	ESRP1,ESRP2	&ESRP1,ESRP2&Similar to ESRP1: Epithelial splicing regulatory protein 1 (Homo sapiens OX=9606)
	G3	bf_00014747	0	0.913348	0.562	0.118	0	Mucin-like protein	&&Similar to Mucin-like protein (Fragment) (Acropora millepora OX=45264)
	G3	bf_00014121	0	0.806884	0.61	0.083	0	LIN28A,LIN28B	&LIN28A,LIN28B&Similar to lin28a: Protein lin-28 homolog A (Xenopus laevis OX=8355)
	G3	bf_00017608	0	0.756977	0.946	0.889	0	Ncam1	&&Similar to Ncam1: Neural cell adhesion molecule 1 (Mus musculus OX=10090)
	G3	bf_00005601	0	0.715165	0.521	0.095	0	Coe	Coe&EBF4,EBF2,EBF1,EBF3&Similar to Ebf3: Transcription factor COE3 (Mus musculus OX=10090)
	G3	bf_00020925	0	0.701857	0.66	0.288	0	SPSB1,SPSB4	&SPSB1,SPSB4&Similar to gus: Protein gustavus (Drosophila melanogaster OX=7227)
	G3	bf_00006566	0	0.68615	0.715	0.378	0	TASOR	&&Similar to TASOR: Protein TASOR (Homo sapiens OX=9606)
	G3	bf_00023809	0	0.664504	0.499	0.097	0	queC	&&Similar to queC: 7-cyano-7-deazaguanine synthase (Pseudomonas syringae pv. syringae (strain B728a) OX=205918)
	G3	bf_00017652	0	0.629926	0.623	0.146	0	Histone H3	&&Similar to Histone H3 (Urechis caupo OX=6431)
	G3	bf_00020170	0	0.609881	0.653	0.268	0	Histone H1	&&Similar to Histone H1 (Tigriopus californicus OX=6832)
	G3	bf_00000872	0	0.600413	0.686	0.425	0	CENPF	&CENPF&Similar to CENPF: Centromere protein F (Homo sapiens OX=9606)
	G3	bf_00026218	0	0.600092	0.524	0.17	0	Dlx	Dlx&DLX1,DLX6&Similar to Homeobox protein DLL homolog (Branchiostoma floridae OX=7739)
	G3	bf_00023817	0	0.596128	0.512	0.163	0	MIMI_R571	&&Similar to MIMI_R571: Uncharacterized protein R571 (Acanthamoeba polyphaga mimivirus OX=212035)
	G3	bf_00008625	0	0.585219	0.412	0.132	0	PDZRN3,PDZD4,PDZRN4	&PDZRN3,PDZD4,PDZRN4&Similar to PDZRN3: E3 ubiquitin-protein ligase PDZRN3 (Homo sapiens OX=9606)
	G3	bf_00013184	0	0.56855	0.783	0.598	0	FAT2,FAT1,FAT3	&FAT2,FAT1,FAT3&Similar to FAT1: Protocadherin Fat 1 (Homo sapiens OX=9606)
	G3	bf_00002359	0	0.558796	0.763	0.585	0	DAZAP1	&DAZAP1&Similar to dazap1: DAZ-associated protein 1 (Xenopus laevis OX=8355)
	G3	bf_00006692	0	0.553985	0.675	0.385	0	ZMIZ1,ZMIZ2	&ZMIZ1,ZMIZ2&Similar to ZMIZ1: Zinc finger MIZ domain-containing protein 1 (Homo sapiens OX=9606)
	G3	bf_00006882	0	0.551021	0.473	0.155	0	ARB_07867	&&Similar to ARB_07867: WSC domain-containing protein ARB_07867 (Arthroderma benhamiae (strain ATCC MYA-4681 / CBS 112371) OX=663331)
	G3	bf_00019708	0	0.532027	0.542	0.125	0	MIDN	&MIDN&Similar to midn: Midnolin (Xenopus tropicalis OX=8364)
	G3	bf_00020546	0	0.529939	0.382	0.139	0	Ephb1	&&Similar to Ephb1: Ephrin type-B receptor 1 (Mus musculus OX=10090)
	G3	bf_00006554	0	0.524125	0.605	0.314	0	HNRNPAB,HNRNPD,HNRNPDL	&HNRNPAB,HNRNPD,HNRNPDL&Similar to HNRNPDL: Heterogeneous nuclear ribonucleoprotein D-like (Gallus gallus OX=9031)
	G3	bf_00024985	0	0.521836	0.472	0.064	0	PRDM14	&PRDM14&Similar to PRDM14: PR domain zinc finger protein 14 (Homo sapiens OX=9606)
	G3	bf_00015528	0	0.51779	0.43	0.063	0	Mucin-like protein	&&Similar to Mucin-like protein (Fragment) (Acropora millepora OX=45264)
	G3	bf_00008662	0	0.503946	0.553	0.13	0	KMT2E	&KMT2E&Similar to Kmt2e: Inactive histone-lysine N-methyltransferase 2E (Mus musculus OX=10090)
	G3	bf_00007539	0	0.50366	0.433	0.136	0	TECB	&&Similar to TECB: Tectonin-2 (Physarum polycephalum OX=5791)
	G3	bf_00024051	0	0.497693	0.401	0.051	0	KRT8	&&Similar to KRT8: Keratin, type II cytoskeletal 8 (Bos taurus OX=9913)
	G3	bf_00016288	0	0.496983	0.985	0.968	0	SCRN3	&&Similar to SCRN3: Secernin-3 (Homo sapiens OX=9606)
	G3	bf_00006881	0	0.494858	0.422	0.069	0	ARB_07867	&&Similar to ARB_07867: WSC domain-containing protein ARB_07867 (Arthroderma benhamiae (strain ATCC MYA-4681 / CBS 112371) OX=663331)
	G3	bf_00023997	0	0.494273	0.439	0.055	0	CCND2,CCND3	&CCND2,CCND3&Similar to CCND2: G1/S-specific cyclin-D2 (Homo sapiens OX=9606)
	G3	bf_00026212	0	0.475649	0.43	0.09	0	prmt1	&&Similar to prmt1: Protein arginine N-methyltransferase 1 (Xenopus tropicalis OX=8364)
	G3	bf_00010727	0	0.470966	1	1	0	fam135b	&&Similar to fam135b: Protein FAM135B (Xenopus laevis OX=8355)
	G3	bf_00010374	0	0.469832	0.571	0.247	0	Srsf4	&&Similar to Srsf4: Serine/arginine-rich splicing factor 4 (Mus musculus OX=10090)
	G3	bf_00007269	0	0.467386	0.409	0.058	0	TSTA3	&&Similar to TSTA3: GDP-L-fucose synthase (Cricetulus griseus OX=10029)
	G3	bf_00000264	0	0.453296	0.715	0.556	0	ATP1A4,ATP1A2,ATP1A3,ATP1A1,ATP4A,ATP12A	&ATP1A4,ATP1A2,ATP1A3,ATP1A1,ATP4A,ATP12A&Similar to ATP1A3: Sodium/potassium-transporting ATPase subunit alpha-3 (Homo sapiens OX=9606)
	G3	bf_00026554	0	0.452233	0.441	0.076	0	pyrB	&&Similar to pyrB: Aspartate carbamoyltransferase (Roseiflexus sp. (strain RS-1) OX=357808)
	G3	bf_00022012	0	0.448831	0.412	0.074	0	TMED6	&&Similar to TMED6: Transmembrane emp24 domain-containing protein 6 (Bos taurus OX=9913)
	G3	bf_00016299	0	0.447884	0.678	0.526	0	Ppn1	&&Similar to Ppn1: Serine/threonine-protein phosphatase PP2A catalytic subunit 1 (Paramecium tetraurelia OX=5888)
	G3	bf_00024930	0	0.446352	0.591	0.384	0	Eomes	BfEomes&EOMES,TBR1&Similar to TBR1: T-box brain protein 1 (Homo sapiens OX=9606)
	G3	bf_00011238	0	0.444222	0.5	0.329	0	NOTCH1	&NOTCH1&Similar to Notch1: Neurogenic locus notch homolog protein 1 (Mus musculus OX=10090)
	G3	bf_00024726	0	0.443963	0.58	0.352	0	CLK2,CLK3,CLK1,CLK4	&CLK2,CLK3,CLK1,CLK4&Similar to Clk2: Dual specificity protein kinase CLK2 (Mus musculus OX=10090)
	G3	bf_00022178	0	0.438954	0.611	0.452	0	VAT1	&VAT1&Similar to Vat1: Synaptic vesicle membrane protein VAT-1 homolog (Rattus norvegicus OX=10116)
	G3	bf_00001058	0	0.430164	0.382	0.043	0	63 kDa sperm flagellar membrane protein	&&Similar to 63 kDa sperm flagellar membrane protein (Strongylocentrotus purpuratus OX=7668)
	G3	bf_00007265	0	0.428148	0.397	0.068	0	agl12	&&Similar to agl12: Low-salt glycan biosynthesis protein Agl12 (Haloferax volcanii (strain ATCC 29605 / DSM 3757 / JCM 8879 / NBRC 14742 / NCIMB 2012 / VKM B-1768 / DS2) OX=309800)
	G3	bf_00018195	0	0.428034	0.534	0.311	0	GPC1,GPC6,GPC4	&GPC1,GPC6,GPC4&Similar to Gpc6: Glypican-6 (Mus musculus OX=10090)
	G3	bf_00021100	0	0.426818	0.505	0.315	0	CEP250,CROCC2,CROCC	&CEP250,CROCC2,CROCC&Similar to CROCC: Rootletin (Homo sapiens OX=9606)
	G3	bf_00018814	0	0.424271	0.413	0.088	0	efnb2a	&&Similar to efnb2a: Ephrin-B2a (Danio rerio OX=7955)
	G3	bf_00012162	0	0.418487	0.536	0.371	0	NR6A1	&NR6A1&Similar to nr6a1: Nuclear receptor subfamily 6 group A member 1 (Xenopus tropicalis OX=8364)
	G3	bf_00002519	0	0.416728	0.436	0.141	0	GREB1,GREB1L	&GREB1,GREB1L&Similar to GREB1L: GREB1-like protein (Homo sapiens OX=9606)
	G3	bf_00004753	0	0.413101	0.485	0.217	0	FGFR3,FGFR4,FGFR1,FGFR2	&FGFR3,FGFR4,FGFR1,FGFR2&Similar to FGFR2: Fibroblast growth factor receptor 2 (Gallus gallus OX=9031)
	G3	bf_00015616	0	0.411129	0.807	0.783	0	H3F3A,H3F3B	&H3F3A,H3F3B&Similar to TGas113e22.1: Histone H3.3 (Xenopus tropicalis OX=8364)
	G3	bf_00019196	0	0.41046	0.568	0.386	0	PTPRS,PTPRD,PTPRF	&PTPRS,PTPRD,PTPRF&Similar to Lar: Tyrosine-protein phosphatase Lar (Drosophila melanogaster OX=7227)
	G3	bf_00015876	0	0.409649	0.309	0.04	0	Netrin	BfNetrin&NTN1&Similar to Ntn1: Netrin-1 (Mus musculus OX=10090)
	G3	bf_00009721	0	0.408029	0.51	0.399	0	CBFA2T2,CBFA2T3,RUNX1T1	&CBFA2T2,CBFA2T3,RUNX1T1&Similar to RUNX1T1: Protein CBFA2T1 (Homo sapiens OX=9606)
	G3	bf_00023067	0	0.402997	0.366	0.049	0	SELE	&&Similar to SELE: E-selectin (Homo sapiens OX=9606)
	G3	bf_00019652	0	0.396617	0.494	0.198	0	RFX3,RFX2,RFX1	&RFX3,RFX2,RFX1&Similar to rfx3: Transcription factor RFX3 (Xenopus tropicalis OX=8364)
	G3	bf_00006993	0	0.395626	0.457	0.141	0	NEO1	&NEO1&Similar to Neogenin (Fragment) (Gallus gallus OX=9031)
	G3	bf_00000171	0	0.393982	0.641	0.471	0	HNRNPUL2,HNRNPU,HNRNPUL1	&HNRNPUL2,HNRNPU,HNRNPUL1&Similar to Hnrnpu: Heterogeneous nuclear ribonucleoprotein U (Rattus norvegicus OX=10116)
	G3	bf_00006678	0	0.393314	0.58	0.377	0	CNOT6,CNOT6L	&CNOT6,CNOT6L&Similar to Cnot6l: CCR4-NOT transcription complex subunit 6-like (Mus musculus OX=10090)
	G3	bf_00008605	0	0.391657	0.47	0.214	0	Magi1	&&Similar to Magi1: Membrane-associated guanylate kinase, WW and PDZ domain-containing protein 1 (Mus musculus OX=10090)
	G3	bf_00005026	0	0.390326	0.305	0.002	0	Cyclic nucleotide-gated channel cone photoreceptor subunit alpha	&&Similar to Cyclic nucleotide-gated channel cone photoreceptor subunit alpha (Gallus gallus OX=9031)
	G3	bf_00001714	0	0.39001	0.594	0.485	0	SOX2	&&Similar to SOX2: Transcription factor SOX-2 (Gallus gallus OX=9031)
	G3	bf_00026105	0	0.388558	0.706	0.601	0	CNTNAP2,CNTNAP5,CNTNAP3C,CNTNAP3,CNTNAP3B,CNTNAP4	&CNTNAP2,CNTNAP5,CNTNAP3C,CNTNAP3,CNTNAP3B,CNTNAP4&Similar to Cntnap2: Contactin-associated protein-like 2 (Mus musculus OX=10090)
	G3	bf_00007284	0	0.387235	0.396	0.095	0	EFNA3,EFNA2,EFNA5,EFNA4,EFNA1	&EFNA3,EFNA2,EFNA5,EFNA4,EFNA1&Similar to EFNB2: Ephrin-B2 (Homo sapiens OX=9606)
	G3	bf_00024043	0	0.381217	0.492	0.237	0	GOLGB1	&&Similar to GOLGB1: Golgin subfamily B member 1 (Homo sapiens OX=9606)
	G3	bf_00013165	0	0.379428	0.296	0.003	0	thrS	&&Similar to thrS: Threonine--tRNA ligase (Bifidobacterium animalis subsp. lactis (strain AD011) OX=442563)
	G3	bf_00010246	0	0.378752	0.522	0.317	0	RREB1	&RREB1&Similar to RREB1: Ras-responsive element-binding protein 1 (Gallus gallus OX=9031)
	G3	bf_00005613	0	0.374284	0.485	0.223	0	CSNK1A1L,CSNK1A1	&CSNK1A1L,CSNK1A1&Similar to Csnk1a1: Casein kinase I isoform alpha (Mus musculus OX=10090)
	G3	bf_00020557	0	0.371173	0.596	0.437	0	EIF4G3,EIF4G1	&EIF4G3,EIF4G1&Similar to EIF4G1: Eukaryotic translation initiation factor 4 gamma 1 (Homo sapiens OX=9606)
	G3	bf_00009230	0	0.371122	1	1	0	Dmbt1	&&Similar to Dmbt1: Deleted in malignant brain tumors 1 protein (Oryctolagus cuniculus OX=9986)
	G3	bf_00015384	0	0.36817	0.523	0.336	0	Llgl1	&&Similar to Llgl1: Lethal(2) giant larvae protein homolog 1 (Rattus norvegicus OX=10116)
	G3	bf_00004304	0	0.367346	0.402	0.144	0	amt-1	&&Similar to amt-1: Putative ammonium transporter 1 (Caenorhabditis elegans OX=6239)
	G3	bf_00017653	0	0.366954	0.426	0.117	0	Histone H2A	&&Similar to Histone H2A (Asterias rubens OX=7604)
	G3	bf_00018081	0	0.362459	0.352	0.027	0	Zic	Zic&ZIC1,ZIC4&Similar to zic4: Zinc finger protein ZIC 4 (Xenopus laevis OX=8355)
	G3	bf_00003636	0	0.362234	0.329	0.033	0	RPA4,RPA2	&RPA4,RPA2&Similar to Dact2: Dapper homolog 2 (Mus musculus OX=10090)
	G3	bf_00005457	0	0.362057	0.729	0.674	0	MKI67	&MKI67&Similar to Mki67: Proliferation marker protein Ki-67 (Mus musculus OX=10090)
	G3	bf_00008041	0	0.357942	0.576	0.422	0	CELSR3,CELSR1,CELSR2	&CELSR3,CELSR1,CELSR2&Similar to CELSR2: Cadherin EGF LAG seven-pass G-type receptor 2 (Homo sapiens OX=9606)
	G3	bf_00020619	0	0.353126	0.487	0.262	0	YBX1,YBX2,YBX3	&YBX1,YBX2,YBX3&Similar to Y-box factor homolog (Aplysia californica OX=6500)
	G3	bf_00012761	0	0.352214	0.415	0.171	0	FBXW7	&FBXW7&Similar to FBXW7: F-box/WD repeat-containing protein 7 (Homo sapiens OX=9606)
	G3	bf_00016098	0	0.351629	0.492	0.436	0	OLFM1	&&Similar to OLFM1: Noelin (Homo sapiens OX=9606)
	G3	bf_00020173	0	0.351109	0.491	0.271	0	zgc	&&Similar to zgc:112234: Histone H2B 1/2 (Danio rerio OX=7955)
	G3	bf_00019823	0	0.350249	0.373	0.036	0	CDC14B,CDC14C,CDC14A	&CDC14B,CDC14C,CDC14A&Similar to CDC14A: Dual specificity protein phosphatase CDC14A (Homo sapiens OX=9606)
	G3	bf_00001974	0	0.34802	0.315	0.025	0	Syne1	&&Similar to Syne1: Nesprin-1 (Mus musculus OX=10090)
	G3	bf_00023905	0	0.34725	0.48	0.417	0	NAV3,NAV2	&NAV3,NAV2&Similar to NAV3: Neuron navigator 3 (Homo sapiens OX=9606)
	G3	bf_00005833	0	0.347055	0.287	0.048	0	FBXL13	&&Similar to FBXL13: Dynein regulatory complex subunit 6 (Homo sapiens OX=9606)
	G3	bf_00006661	0	0.346618	0.575	0.5	0	fhaB	&&Similar to fhaB: Filamentous hemagglutinin (Bordetella pertussis (strain Tohama I / ATCC BAA-589 / NCTC 13251) OX=257313)
	G3	bf_00015187	0	0.341945	0.335	0.011	0	dus	&&Similar to dus: Probable tRNA-dihydrouridine synthase (Rickettsia prowazekii (strain Madrid E) OX=272947)
	G3	bf_00007497	0	0.34073	0.334	0.03	0	ARB_07867	&&Similar to ARB_07867: WSC domain-containing protein ARB_07867 (Arthroderma benhamiae (strain ATCC MYA-4681 / CBS 112371) OX=663331)
	G3	bf_00008080	0	0.338526	0.52	0.358	0	DAG1	&DAG1&Similar to DAG1: Dystroglycan (Sus scrofa OX=9823)
	G3	bf_00023170	0	0.338196	0.6	0.459	0	SETD2	&SETD2&Similar to SETD2: Histone-lysine N-methyltransferase SETD2 (Homo sapiens OX=9606)
	G3	bf_00003252	0	0.335616	0.691	0.676	0	Lama2	&&Similar to Lama2: Laminin subunit alpha-2 (Mus musculus OX=10090)
	G3	bf_00019279	0	0.334289	0.357	0.081	0	KLF4	&&Similar to KLF4: Krueppel-like factor 4 (Homo sapiens OX=9606)
	G3	bf_00001114	0	0.33323	0.332	0.019	0	LOC390937,ETV3L	&LOC390937,ETV3L&Similar to ERF: ETS domain-containing transcription factor ERF (Homo sapiens OX=9606)
	G3	bf_00014339	0	0.330347	0.439	0.208	0	SYNCRIP,HNRNPR	&SYNCRIP,HNRNPR&Similar to Syncrip: Heterogeneous nuclear ribonucleoprotein Q (Mus musculus OX=10090)
	G3	bf_00004925	0	0.328779	0.51	0.347	0	SMC3	&SMC3&Similar to SMC3: Structural maintenance of chromosomes protein 3 (Pongo abelii OX=9601)
	G3	bf_00005916	0	0.327566	0.455	0.268	0	PRC1	&PRC1&Similar to Prc1: Protein regulator of cytokinesis 1 (Mus musculus OX=10090)
	G3	bf_00011091	0	0.325662	0.534	0.366	0	DDX39B,DDX39A	&DDX39B,DDX39A&Similar to Ddx39b: Spliceosome RNA helicase Ddx39b (Rattus norvegicus OX=10116)
	G3	bf_00021102	0	0.325263	0.373	0.224	0	FoxE4	FoxE4&&Similar to foxe4: Forkhead box protein E4 (Xenopus laevis OX=8355)
	G3	bf_00025125	0	0.324799	0.596	0.464	0	SCRIB	&SCRIB&Similar to SCRIB: Protein scribble homolog (Homo sapiens OX=9606)
	G3	bf_00003946	0	0.324536	0.421	0.296	0	GRHL1,GRHL2	&GRHL1,GRHL2&Similar to grhl1: Grainyhead-like protein 1 homolog (Xenopus laevis OX=8355)
	G3	bf_00019786	0	0.323918	0.51	0.355	0	KANK4,KANK2,KANK3	&KANK4,KANK2,KANK3&Similar to KANK1: KN motif and ankyrin repeat domain-containing protein 1 (Homo sapiens OX=9606)
	G3	bf_00026336	0	0.322267	0.394	0.165	0	nas-6	&&Similar to nas-6: Zinc metalloproteinase nas-6 (Caenorhabditis elegans OX=6239)
	G3	bf_00001118	0	0.321742	0.495	0.316	0	APP,APLP2	&APP,APLP2&Similar to APLP1: Amyloid-like protein 1 (Homo sapiens OX=9606)
	G3	bf_00022830	0	0.320914	0.598	0.531	0	CDC6	&CDC6&Similar to CDC6: Cell division control protein 6 homolog (Homo sapiens OX=9606)
	G3	bf_00024119	0	0.318897	0.515	0.378	0	INCENP	&INCENP&Similar to incenp-a: Inner centromere protein A (Xenopus laevis OX=8355)
	G3	bf_00014667	0	0.317554	0.34	0.085	0	CNTN2	&&Similar to CNTN2: Contactin-2 (Gallus gallus OX=9031)
	G3	bf_00019893	0	0.317331	0.43	0.264	0	SYDE1,SYDE2	&SYDE1,SYDE2&Similar to SYDE2: Rho GTPase-activating protein SYDE2 (Homo sapiens OX=9606)
	G3	bf_00002532	0	0.315424	0.445	0.259	0	KHDRBS3,KHDRBS2,KHDRBS1	&KHDRBS3,KHDRBS2,KHDRBS1&Similar to KHDRBS3: KH domain-containing, RNA-binding, signal transduction-associated protein 3 (Homo sapiens OX=9606)
	G3	bf_00005961	0	0.315408	0.568	0.469	0	KDM3A,KDM3B	&KDM3A,KDM3B&Similar to KDM3B: Lysine-specific demethylase 3B (Homo sapiens OX=9606)
	G3	bf_00023171	0	0.315369	0.406	0.196	0	FZD6,FZD1,FZD7,FZD2	&FZD6,FZD1,FZD7,FZD2&Similar to fzd1: Frizzled-1 (Xenopus laevis OX=8355)
	G3	bf_00008183	0	0.313025	0.567	0.526	0	LRIG3	LRIG3&LRIG3&Similar to LRIG3: Leucine-rich repeats and immunoglobulin-like domains protein 3 (Homo sapiens OX=9606)
	G3	bf_00006059	0	0.312374	0.269	0.044	0	PRKG2	&PRKG2&Similar to PRKG2: cGMP-dependent protein kinase 2 (Homo sapiens OX=9606)
	G3	bf_00006323	0	0.311728	0.417	0.198	0	TCF7L1,TCF7L2,TCF7	&TCF7L1,TCF7L2,TCF7&Similar to Tcf7l2: Transcription factor 7-like 2 (Mus musculus OX=10090)
	G3	bf_00014477	0	0.310211	0.4	0.131	0	SFPQ,PSPC1,NONO	&SFPQ,PSPC1,NONO&Similar to SFPQ: Splicing factor, proline- and glutamine-rich (Homo sapiens OX=9606)
	G3	bf_00014594	0	0.309947	0.264	0.046	0	Bra2	Bra2&&Similar to TBXT: T-box transcription factor T homolog 2 (Branchiostoma floridae OX=7739)
	G3	bf_00014497	0	0.309369	0.441	0.256	0	Cdh6	&&Similar to Cdh6: Cadherin-6 (Mus musculus OX=10090)
	G3	bf_00000760	0	0.307988	0.511	0.354	0	PTK7	&PTK7&Similar to PTK7: Inactive tyrosine-protein kinase 7 (Homo sapiens OX=9606)
	G3	bf_00001833	0	0.30723	0.425	0.183	0	DYRK1A,DYRK1B	&DYRK1A,DYRK1B&Similar to dyrk1a: Dual specificity tyrosine-phosphorylation-regulated kinase 1A (Xenopus laevis OX=8355)
	G3	bf_00025396	0	0.305963	0.326	0.025	0	ZCCHC13	&&Similar to ZCCHC13: Zinc finger CCHC domain-containing protein 13 (Homo sapiens OX=9606)
	G3	bf_00015832	0	0.304699	0.326	0.094	0	RBFOX3,RBFOX1	&RBFOX3,RBFOX1&Similar to rbfox2: RNA binding protein fox-1 homolog 2 (Xenopus laevis OX=8355)
	G3	bf_00013993	0	0.304131	0.589	0.472	0	AKIRIN1,AKIRIN2	&AKIRIN1,AKIRIN2&Similar to Uncharacterized protein C1orf108 homolog B (Xenopus laevis OX=8355)
	G3	bf_00017420	0	0.304047	0.412	0.178	0	MYO18A	&MYO18A&Similar to MYO18A: Unconventional myosin-XVIIIa (Homo sapiens OX=9606)
	G3	bf_00002494	0	0.303606	0.652	0.592	0	Rrm2	&&Similar to Rrm2: Ribonucleoside-diphosphate reductase subunit M2 (Mus musculus OX=10090)
	G3	bf_00008287	0	0.301031	0.62	0.575	0	LAMB4,LAMB2,LAMB1	&LAMB4,LAMB2,LAMB1&Similar to LAMB1: Laminin subunit beta-1 (Homo sapiens OX=9606)
	G3	bf_00025237	0	0.29893	0.475	0.321	0	PUM2,PUM1	&PUM2,PUM1&Similar to pum2: Pumilio homolog 2 (Xenopus laevis OX=8355)
	G3	bf_00009068	0	0.298808	0.324	0.047	0	BICD1,BICD2	&BICD1,BICD2&Similar to BICD2: Protein bicaudal D homolog 2 (Homo sapiens OX=9606)
	G3	bf_00010024	0	0.297309	0.798	0.798	0	CHD8,CHD6,CHD7,CHD9	&CHD8,CHD6,CHD7,CHD9&Similar to CHD7: Chromodomain-helicase-DNA-binding protein 7 (Gallus gallus OX=9031)
	G3	bf_00023115	0	0.297194	0.306	0.021	0	ANK3	&&Similar to ANK3: Ankyrin-3 (Homo sapiens OX=9606)
	G3	bf_00010729	0	0.296273	0.941	0.893	0	IDUA	&&Similar to IDUA: Alpha-L-iduronidase (Canis lupus familiaris OX=9615)
	G3	bf_00010272	0	0.294835	0.498	0.435	0	NUGGC	&NUGGC&Similar to Nuggc: Nuclear GTPase SLIP-GC (Mus musculus OX=10090)
	G3	bf_00014679	0	0.293897	0.291	0.017	0	FHL2	&&Similar to FHL2: Four and a half LIM domains protein 2 (Bos taurus OX=9913)
	G3	bf_00011716	0	0.291544	0.607	0.576	0	LAMC1,LAMC3	&LAMC1,LAMC3&Similar to lamc1: Laminin subunit gamma-1 (Xenopus tropicalis OX=8364)
	G3	bf_00001762	0	0.29046	0.32	0.057	0	B4GALNT1	&&Similar to B4GALNT1: Beta-1,4 N-acetylgalactosaminyltransferase 1 (Homo sapiens OX=9606)
	G3	bf_00014370	0	0.290456	0.299	0.029	0	MYH13	&&Similar to MYH13: Myosin-13 (Homo sapiens OX=9606)
	G3	bf_00013755	0	0.28646	0.422	0.296	0	DMD,UTRN	&DMD,UTRN&Similar to DMD: Dystrophin (Gallus gallus OX=9031)
	G3	bf_00020130	0	0.28538	0.463	0.344	0	PTBP2,PTBP3,PTBP1	&PTBP2,PTBP3,PTBP1&Similar to Ptbp1: Polypyrimidine tract-binding protein 1 (Rattus norvegicus OX=10116)
	G3	bf_00002958	0	0.283513	0.401	0.194	0	ZFR,ZFR2	&ZFR,ZFR2&Similar to ZFR: Zinc finger RNA-binding protein (Homo sapiens OX=9606)
	G3	bf_00002977	0	0.283372	0.405	0.196	0	DENND4A,DENND4C	&DENND4A,DENND4C&Similar to DENND4A: C-myc promoter-binding protein (Homo sapiens OX=9606)
	G3	bf_00000042	0	0.28297	0.367	0.218	0	KIF26B,KIF26A	&KIF26B,KIF26A&Similar to Kif26a: Kinesin-like protein KIF26A (Mus musculus OX=10090)
	G3	bf_00026345	0	0.279389	0.557	0.463	0	BAZ2B	&BAZ2B&Similar to BAZ2B: Bromodomain adjacent to zinc finger domain protein 2B (Homo sapiens OX=9606)
	G3	bf_00002799	0	0.278524	0.505	0.384	0	Skor2	&&Similar to Skor2: SKI family transcriptional corepressor 2 (Mus musculus OX=10090)
	G3	bf_00022865	0	0.276829	0.326	0.072	0	DNAH7	&DNAH7&Similar to DNAH7: Dynein heavy chain 7, axonemal (Homo sapiens OX=9606)
	G3	bf_00011694	0	0.276661	0.306	0.017	0	aq_1632	&&Similar to aq_1632: Putative L-lysine 2,3-aminomutase aq_1632 (Aquifex aeolicus (strain VF5) OX=224324)
	G3	bf_00006394	0	0.275172	0.329	0.106	0	PAPSS2,PAPSS1	&PAPSS2,PAPSS1&Similar to Bifunctional 3'-phosphoadenosine 5'-phosphosulfate synthase (Urechis caupo OX=6431)
	G3	bf_00003049	0	0.273681	0.298	0.047	0	PRMT8	&&Similar to PRMT8: Protein arginine N-methyltransferase 8 (Homo sapiens OX=9606)
	G3	bf_00020577	0	0.273672	0.263	0.049	0	Megf6	&&Similar to Megf6: Multiple epidermal growth factor-like domains protein 6 (Mus musculus OX=10090)
	G3	bf_00007268	0	0.273617	0.283	0.05	0	Tsta3	&&Similar to Tsta3: GDP-L-fucose synthase (Mus musculus OX=10090)
	G3	bf_00009543	0	0.273167	0.466	0.331	0	TPX2	&TPX2&Similar to TPX2: Targeting protein for Xklp2 homolog (Patiria pectinifera OX=7594)
	G3	bf_00020848	0	0.272544	0.618	0.572	0	Prdm10	&&Similar to Prdm10: PR domain zinc finger protein 10 (Mus musculus OX=10090)
	G3	bf_00007516	0	0.272101	0.269	0.036	0	Svep1	&&Similar to Svep1: Sushi, von Willebrand factor type A, EGF and pentraxin domain-containing protein 1 (Mus musculus OX=10090)
	G3	bf_00019146	0	0.272089	0.301	0.048	0	Short neurotoxin 2	&&Similar to Short neurotoxin 2 (Hemachatus haemachatus OX=8626)
	G3	bf_00008906	0	0.270953	0.753	0.766	0	PIM3,PIM1	&PIM3,PIM1&Similar to PIM3: Serine/threonine-protein kinase pim-3 (Coturnix japonica OX=93934)
	G3	bf_00010025	0	0.269752	0.36	0.164	0	RBL2,RBL1	&RBL2,RBL1&Similar to RBL1: Retinoblastoma-like protein 1 (Homo sapiens OX=9606)
	G3	bf_00017680	0	0.268788	0.549	0.497	0	KDM6B,KDM6A,UTY	&KDM6B,KDM6A,UTY&Similar to KDM6A: Lysine-specific demethylase 6A (Homo sapiens OX=9606)
	G3	bf_00000355	0	0.263628	0.367	0.189	0	ACTN1,ACTN4,ACTN3,ACTN2	&ACTN1,ACTN4,ACTN3,ACTN2&Similar to Actn: Alpha-actinin, sarcomeric (Drosophila melanogaster OX=7227)
	G3	bf_00001107	0	0.260047	0.261	0.026	0	Ets1_2	Ets1_2&ETS1,ETS2&Similar to ETS1: Transforming protein p68/c-ets-1 (Gallus gallus OX=9031)
	G3	bf_00018833	0	0.259706	0.487	0.362	0	RAB15	&&Similar to RAB15: Glycine-rich RNA-binding, abscisic acid-inducible protein (Zea mays OX=4577)
	G3	bf_00022233	0	0.258724	0.281	0.051	0	MIMI_R571	&&Similar to MIMI_R571: Uncharacterized protein R571 (Acanthamoeba polyphaga mimivirus OX=212035)
	G3	bf_00004402	0	0.258253	0.462	0.327	0	Srsf3	&&Similar to Srsf3: Serine/arginine-rich splicing factor 3 (Mus musculus OX=10090)
	G3	bf_00014181	0	0.257724	0.564	0.495	0	Cyp4f14	&&Similar to Cyp4f14: Leukotriene-B4 omega-hydroxylase 3 (Mus musculus OX=10090)
	G3	bf_00007216	0	0.25671	0.305	0.076	0	Ece1	&&Similar to Ece1: Endothelin-converting enzyme 1 (Rattus norvegicus OX=10116)
	G3	bf_00012311	0	0.255994	0.275	0.106	0	APBB1,APBB2	&APBB1,APBB2&Similar to APBB2: Amyloid-beta A4 precursor protein-binding family B member 2 (Homo sapiens OX=9606)
	G3	bf_00002902	0	0.255814	0.346	0.126	0	MYEF2	&MYEF2&Similar to Myef2: Myelin expression factor 2 (Mus musculus OX=10090)
	G3	bf_00000161	0	0.255737	0.283	0.029	0	DPYSL5	&DPYSL5&Similar to DPYSL3: Dihydropyrimidinase-related protein 3 (Homo sapiens OX=9606)
	G3	bf_00011941	0	0.255705	0.273	0.027	0	N	&&Similar to N: Neurogenic locus Notch protein (Drosophila melanogaster OX=7227)
	G3	bf_00004244	0	0.253631	0.609	0.577	0	EIF4G2	&EIF4G2&Similar to EIF4G2: Eukaryotic translation initiation factor 4 gamma 2 (Pongo abelii OX=9601)
	G3	bf_00024911	0	0.25328	0.443	0.333	0	SULF2,SULF1	&SULF2,SULF1&Similar to Sulf1: Extracellular sulfatase Sulf-1 (Mus musculus OX=10090)
	G3	bf_00014272	0	0.2513	0.666	0.715	0	Rest	&&Similar to Rest: RE1-silencing transcription factor (Rattus norvegicus OX=10116)
	G3	bf_00007045	0	0.250139	0.274	0.043	0	PGS1	&&Similar to PGS1: CDP-diacylglycerol--glycerol-3-phosphate 3-phosphatidyltransferase, mitochondrial (Gallus gallus OX=9031)
	G3	bf_00002099	0	0.249233	0.271	0.018	0	yajC	&&Similar to yajC: Sec translocon accessory complex subunit YajC (Buchnera aphidicola subsp. Baizongia pistaciae (strain Bp) OX=224915)
	G3	bf_00022180	0	0.249145	0.287	0.089	0	RND2,RND3	&RND2,RND3&Similar to Rnd3: Rho-related GTP-binding protein RhoE (Rattus norvegicus OX=10116)
	G3	bf_00006145	0	0.249104	0.286	0.052	0	CCAR1	&CCAR1&Similar to Ccar1: Cell division cycle and apoptosis regulator protein 1 (Mus musculus OX=10090)
	G3	bf_00021894	0	0.248793	0.325	0.096	0	FUS,TAF15	&FUS,TAF15&Similar to TAF15: TATA-binding protein-associated factor 2N (Homo sapiens OX=9606)
	G3	bf_00022627	0	0.246216	0.268	0.03	0	DDAH1	&&Similar to DDAH1: N(G),N(G)-dimethylarginine dimethylaminohydrolase 1 (Homo sapiens OX=9606)
	G3	bf_00010453	0	0.246007	0.276	0.047	0	Glutathione S-transferase A	&&Similar to Glutathione S-transferase A (Pleuronectes platessa OX=8262)
	G3	bf_00011212	0	0.245933	0.338	0.152	0	ZNF271	&&Similar to ZNF271: Zinc finger protein 271 (Pongo abelii OX=9601)
	G3	bf_00009569	0	0.245633	0.528	0.457	0	TRIM71	&TRIM71&Similar to trim71: E3 ubiquitin-protein ligase TRIM71 (Danio rerio OX=7955)
	G3	bf_00007456	0	0.245494	0.326	0.099	0	SAFB,SAFB2	&SAFB,SAFB2&Similar to SAFB2: Scaffold attachment factor B2 (Homo sapiens OX=9606)
	G3	bf_00025166	0	0.245406	0.228	0.05	0	BMP5,BMP6,BMP7	&BMP5,BMP6,BMP7&Similar to Bmp7: Bone morphogenetic protein 7 (Mus musculus OX=10090)
	G3	bf_00013215	0	0.245005	0.294	0.113	0	OCA2	&OCA2&Similar to Oca2: P protein (Sus scrofa OX=9823)
	G3	bf_00014387	0	0.243929	0.353	0.164	0	QKI	&QKI&Similar to Qki: Protein quaking (Rattus norvegicus OX=10116)
	G3	bf_00023369	0	0.243785	0.759	0.772	0	JUP,CTNNB1	&JUP,CTNNB1&Similar to Catenin beta (Urechis caupo OX=6431)
	G3	bf_00016310	0	0.24298	0.453	0.362	0	AXIN1	&AXIN1&Similar to axin1: Axin-1 (Xenopus laevis OX=8355)
	G3	bf_00011511	0	0.240682	0.24	0.024	0	CDX4	&&Similar to CDX4: Homeobox protein CDX-4 (Homo sapiens OX=9606)
	G3	bf_00010227	0	0.239762	0.288	0.049	0	MTSS1,MTSS2	&MTSS1,MTSS2&Similar to MTSS1: Protein MTSS 1 (Homo sapiens OX=9606)
	G3	bf_00008549	0	0.239533	0.371	0.207	0	ARHGEF3,NET1	&ARHGEF3,NET1&Similar to Net1: Neuroepithelial cell-transforming gene 1 protein (Mus musculus OX=10090)
	G3	bf_00004209	0	0.23896	0.365	0.188	0	SNRNP70	&SNRNP70&Similar to snrnp70: U1 small nuclear ribonucleoprotein 70 kDa (Xenopus tropicalis OX=8364)
	G3	bf_00011922	0	0.238597	0.575	0.543	0	FUBP1	&FUBP1&Similar to FUBP1: Far upstream element-binding protein 1 (Homo sapiens OX=9606)
	G3	bf_00010053	0	0.238358	0.342	0.174	0	RNF31	&RNF31&Similar to Rnf31: E3 ubiquitin-protein ligase RNF31 (Mus musculus OX=10090)
	G3	bf_00023906	0	0.238238	0.49	0.427	0	E2F8	&E2F8&Similar to E2F8: Transcription factor E2F8 (Homo sapiens OX=9606)
	G3	bf_00010130	0	0.235697	0.389	0.242	0	ANLN	&ANLN&Similar to anln: Anillin (Xenopus laevis OX=8355)
	G3	bf_00008677	0	0.235013	0.384	0.263	0	ST7,ST7L	&ST7,ST7L&Similar to ST7: Suppressor of tumorigenicity 7 protein homolog (Gallus gallus OX=9031)
	G3	bf_00020717	0	0.234228	0.489	0.435	0	CLSTN2,CLSTN1	&CLSTN2,CLSTN1&Similar to CLSTN1: Calsyntenin-1 (Homo sapiens OX=9606)
	G3	bf_00000489	0	0.234007	0.292	0.125	0	FoxQ2	BfFoxQ2&&Similar to FOXB1: Forkhead box protein B1 (Homo sapiens OX=9606)
	G3	bf_00025330	0	0.232559	0.344	0.19	0	SLCO3A1	&SLCO3A1&Similar to SLCO5A1: Solute carrier organic anion transporter family member 5A1 (Homo sapiens OX=9606)
	G3	bf_00008291	0	0.23173	0.51	0.452	0	BRPF1,BRD1,BRPF3	&BRPF1,BRD1,BRPF3&Similar to BRPF1: Peregrin (Homo sapiens OX=9606)
	G3	bf_00013830	0	0.231229	0.263	0.004	0	CASR	&CASR&Similar to Casr: Extracellular calcium-sensing receptor (Mus musculus OX=10090)
	G3	bf_00018808	0	0.230932	0.353	0.197	0	CASK	&CASK&Similar to CASK: Peripheral plasma membrane protein CASK (Homo sapiens OX=9606)
	G3	bf_00012394	0	0.230907	0.273	0.064	0	ZNF568	&&Similar to ZNF568: Zinc finger protein 568 (Homo sapiens OX=9606)
	G3	bf_00022843	0	0.230546	0.25	0.061	0	SP5	&SP5&Similar to SP5: Transcription factor Sp5 (Homo sapiens OX=9606)
	G3	bf_00002972	0	0.229343	0.45	0.349	0	UBC	&UBC&Similar to Ubc: Polyubiquitin-C (Rattus norvegicus OX=10116)
	G3	bf_00004943	0	0.228212	0.323	0.152	0	CTNNA2,CTNNA1,CTNNA3	&CTNNA2,CTNNA1,CTNNA3&Similar to CTNNA2: Catenin alpha-2 (Pongo abelii OX=9601)
	G3	bf_00022456	0	0.228032	0.403	0.31	0	AKAP9	&AKAP9&Similar to Akap9: A-kinase anchor protein 9 (Mus musculus OX=10090)
	G3	bf_00001924	0	0.228003	0.215	0.029	0	Lefty1	Lefty1&LEFTY1,LEFTY2&Similar to LEFTY1: Left-right determination factor 1 (Homo sapiens OX=9606)
	G3	bf_00000834	0	0.227928	0.245	0.012	0	ZFP36L1	&ZFP36L1&Similar to Zfp36l1: mRNA decay activator protein ZFP36L1 (Rattus norvegicus OX=10116)
	G3	bf_00012339	0	0.227617	0.308	0.073	0	GLYR1	&GLYR1&Similar to glyr1: Putative oxidoreductase GLYR1 (Danio rerio OX=7955)
	G3	bf_00004413	0	0.226944	0.309	0.188	0	PPFIBP1	&PPFIBP1&Similar to PPFIBP1: Liprin-beta-1 (Homo sapiens OX=9606)
	G3	bf_00012585	0	0.226569	0.254	0.038	0	Limch1	&&Similar to Limch1: LIM and calponin homology domains-containing protein 1 (Mus musculus OX=10090)
	G3	bf_00013619	0	0.226263	0.371	0.247	0	ANKRD50	&&Similar to ANKRD50: Ankyrin repeat domain-containing protein 50 (Homo sapiens OX=9606)
	G3	bf_00008846	0	0.226085	0.218	0.043	0	GATA1_2_3	GATA1_2_3&GATA2,GATA3&Similar to GATA2: GATA-binding factor 2 (Gallus gallus OX=9031)
	G3	bf_00014334	0	0.22593	0.262	0.051	0	Cdh6	&&Similar to Cdh6: Cadherin-6 (Mus musculus OX=10090)
	G3	bf_00026120	0	0.225508	0.368	0.198	0	HNRNPA2B1,HNRNPA3,HNRNPA1,HNRNPA1L2	&HNRNPA2B1,HNRNPA3,HNRNPA1,HNRNPA1L2&Similar to HNRNPA1: Heterogeneous nuclear ribonucleoprotein A1 (Pan troglodytes OX=9598)
	G3	bf_00001050	0	0.225491	0.475	0.415	0	PPP4R3B,PPP4R3A	&PPP4R3B,PPP4R3A&Similar to smek1: Serine/threonine-protein phosphatase 4 regulatory subunit 3 (Danio rerio OX=7955)
	G3	bf_00018102	0	0.225252	0.307	0.145	0	TM9SF2	&TM9SF2&Similar to TM9SF2: Transmembrane 9 superfamily member 2 (Pongo abelii OX=9601)
	G3	bf_00025031	0	0.224979	0.458	0.355	0	PABPC3,PABPC1,PABPC1L,PABPC4	&PABPC3,PABPC1,PABPC1L,PABPC4&Similar to PABPC4: Polyadenylate-binding protein 4 (Homo sapiens OX=9606)
	G3	bf_00000777	0	0.224831	0.196	0.034	0	CRIM1	&CRIM1&Similar to CRIM1: Cysteine-rich motor neuron 1 protein (Gallus gallus OX=9031)
	G3	bf_00022057	0	0.224765	0.392	0.277	0	dbf4	&&Similar to dbf4: Protein DBF4 homolog A (Xenopus laevis OX=8355)
	G3	bf_00011691	0	0.224623	0.266	0.038	0	TGFBR3	&TGFBR3&Similar to Tgfbr3: Transforming growth factor beta receptor type 3 (Mus musculus OX=10090)
	G3	bf_00002506	0	0.224471	0.36	0.21	0	EPB41L1,EPB41L3,EPB41L2,EPB41	&EPB41L1,EPB41L3,EPB41L2,EPB41&Similar to Epb41l1: Band 4.1-like protein 1 (Mus musculus OX=10090)
	G3	bf_00017638	0	0.224182	0.473	0.401	0	ZNRF3	&ZNRF3&Similar to Znrf3: E3 ubiquitin-protein ligase ZNRF3 (Mus musculus OX=10090)
	G3	bf_00012971	0	0.223998	0.395	0.353	0	FREM3,FREM2	&FREM3,FREM2&Similar to FREM2: FRAS1-related extracellular matrix protein 2 (Homo sapiens OX=9606)
	G3	bf_00003997	0	0.22355	0.236	0.024	0	Hgf	&&Similar to Hgf: Hepatocyte growth factor (Rattus norvegicus OX=10116)
	G3	bf_00001883	0	0.220354	0.386	0.258	0	LBR,TM7SF2	&LBR,TM7SF2&Similar to LBR: Delta(14)-sterol reductase (Gallus gallus OX=9031)
	G3	bf_00020527	0	0.220019	0.237	0.022	0	ABCC4	&&Similar to ABCC4: Multidrug resistance-associated protein 4 (Homo sapiens OX=9606)
	G3	bf_00023649	0	0.219885	0.215	0.018	0	SPON1	&&Similar to SPON1: Spondin-1 (Gallus gallus OX=9031)
	G3	bf_00000669	0	0.219159	0.369	0.226	0	HNRNPL	&HNRNPL&Similar to Hnrnpl: Heterogeneous nuclear ribonucleoprotein L (Rattus norvegicus OX=10116)
	G3	bf_00013115	0	0.219105	0.366	0.228	0	RECQL5	&RECQL5&Similar to Recql5: ATP-dependent DNA helicase Q5 (Rattus norvegicus OX=10116)
	G3	bf_00010047	0	0.217987	0.259	0.067	0	VAT1L	&VAT1L&Similar to Vat1l: Synaptic vesicle membrane protein VAT-1 homolog-like (Mus musculus OX=10090)
	G3	bf_00017485	0	0.216865	0.497	0.445	0	NLK	&NLK&Similar to NLK: Serine/threonine-protein kinase NLK (Canis lupus familiaris OX=9615)
	G3	bf_00013656	0	0.216633	0.63	0.638	0	CREBBP,EP300	&CREBBP,EP300&Similar to Crebbp: CREB-binding protein (Rattus norvegicus OX=10116)
	G3	bf_00001316	0	0.216609	0.508	0.455	0	KIF16B	&&Similar to KIF16B: Kinesin-like protein KIF16B (Homo sapiens OX=9606)
	G3	bf_00000902	0	0.215213	0.347	0.191	0	Gsk3	Gsk3&GSK3A,GSK3B&Similar to GSK3B: Glycogen synthase kinase-3 beta (Homo sapiens OX=9606)
	G3	bf_00012371	0	0.215168	0.21	0.027	0	slc6a9	&&Similar to slc6a9: Sodium- and chloride-dependent glycine transporter 1 (Xenopus laevis OX=8355)
	G3	bf_00005238	0	0.215079	0.241	0.099	0	LZTS2,LZTS1	&LZTS2,LZTS1&Similar to lzts2: Leucine zipper putative tumor suppressor 2 homolog (Xenopus tropicalis OX=8364)
	G3	bf_00006201	0	0.214576	0.215	0.02	0	ZCCHC24	&ZCCHC24&Similar to ZCCHC24: Zinc finger CCHC domain-containing protein 24 (Homo sapiens OX=9606)
	G3	bf_00023325	0	0.214445	0.228	0.016	0	Keratin	BfKeratin&&Similar to Krt36: Keratin, type I cuticular Ha6 (Mus musculus OX=10090)
	G3	bf_00005165	0	0.214066	0.431	0.344	0	ADGRA3	&ADGRA3&Similar to Adgra3: Adhesion G protein-coupled receptor A3 (Mus musculus OX=10090)
	G3	bf_00003998	0	0.214051	0.248	0.037	0	bzw1a	&&Similar to bzw1a: Basic leucine zipper and W2 domain-containing protein 1-A (Danio rerio OX=7955)
	G3	bf_00007266	0	0.213482	0.245	0.028	0	FucTA	&&Similar to FucTA: Glycoprotein 3-alpha-L-fucosyltransferase A (Drosophila melanogaster OX=7227)
	G3	bf_00025468	0	0.212973	0.399	0.338	0	UBR5	&UBR5&Similar to Ubr5: E3 ubiquitin-protein ligase UBR5 (Mus musculus OX=10090)
	G3	bf_00006749	0	0.212482	0.305	0.118	0	PNRC2	&PNRC2&Similar to PNRC2: Proline-rich nuclear receptor coactivator 2 (Gallus gallus OX=9031)
	G3	bf_00009311	0	0.212302	0.37	0.255	0	ATP2B3,ATP2B2,ATP2B1,ATP2B4	&ATP2B3,ATP2B2,ATP2B1,ATP2B4&Similar to ATP2B3: Plasma membrane calcium-transporting ATPase 3 (Homo sapiens OX=9606)
	G3	bf_00009437	0	0.211655	0.269	0.067	0	ANKRD12	&ANKRD12&Similar to ANKRD11: Ankyrin repeat domain-containing protein 11 (Homo sapiens OX=9606)
	G3	bf_00010140	0	0.211597	0.258	0.083	0	NKD2,NKD1	&NKD2,NKD1&Similar to nkd1: Protein naked cuticle homolog 1 (Danio rerio OX=7955)
	G3	bf_00008487	0	0.211157	0.357	0.217	0	FRMD4A	&FRMD4A&Similar to Frmd4a: FERM domain-containing protein 4A (Mus musculus OX=10090)
	G3	bf_00018843	0	0.211029	0.249	0.073	0	Flna	&&Similar to Flna: Filamin-A (Mus musculus OX=10090)
	G3	bf_00006244	0	0.210777	0.251	0.072	0	SORBS3	&SORBS3&Similar to SORBS3: Vinexin (Homo sapiens OX=9606)
	G3	bf_00020114	0	0.210731	0.515	0.479	0	NIPBL	&NIPBL&Similar to NIPBL: Nipped-B-like protein (Homo sapiens OX=9606)
	G3	bf_00000966	0	0.210053	0.545	0.588	0	NID2,NID1	&NID2,NID1&Similar to Nid1: Nidogen-1 (Mus musculus OX=10090)
	G3	bf_00021568	0	0.209092	0.182	0.031	0	crtac1	&&Similar to crtac1: Cartilage acidic protein 1 (Xenopus tropicalis OX=8364)
	G3	bf_00003013	0	0.208596	0.425	0.373	0	TLE2,TLE4,TLE1,TLE3	&TLE2,TLE4,TLE1,TLE3&Similar to tle3b: Transducin-like enhancer protein 3-B (Danio rerio OX=7955)
	G3	bf_00000913	0	0.208586	0.482	0.407	0	KIFC1	&KIFC1&Similar to Carboxy-terminal kinesin 2 (Xenopus laevis OX=8355)
	G3	bf_00019739	0	0.208519	0.407	0.308	0	TNPO1,TNPO2	&TNPO1,TNPO2&Similar to TNPO1: Transportin-1 (Homo sapiens OX=9606)
	G3	bf_00001399	0	0.208023	0.273	0.091	0	ROBO3,ROBO1,ROBO2	&ROBO3,ROBO1,ROBO2&Similar to Robo1: Roundabout homolog 1 (Rattus norvegicus OX=10116)
	G3	bf_00015233	0	0.207674	0.362	0.242	0	CSNK1E,TPTEP2-CSNK1E,CSNK1D	&CSNK1E,TPTEP2-CSNK1E,CSNK1D&Similar to Csnk1d: Casein kinase I isoform delta (Rattus norvegicus OX=10116)
	G3	bf_00020082	0	0.205926	0.274	0.106	0	YTHDC1	&YTHDC1&Similar to YTHDC1: YTH domain-containing protein 1 (Homo sapiens OX=9606)
	G3	bf_00004679	0	0.204835	0.323	0.178	0	MXD3,MXD4,MXD1,MXI1	&MXD3,MXD4,MXD1,MXI1&Similar to Mxi1: Max-interacting protein 1 (Mus musculus OX=10090)
	G3	bf_00008721	0	0.204256	0.261	0.09	0	CAMK1,CAMK1D	&CAMK1,CAMK1D&Similar to Camk1d: Calcium/calmodulin-dependent protein kinase type 1D (Mus musculus OX=10090)
	G3	bf_00003363	0	0.204028	0.469	0.433	0	MYBL1	&MYBL1&Similar to MYBL1: Myb-related protein A (Homo sapiens OX=9606)
	G3	bf_00008923	0	0.203232	0.305	0.113	0	SEC61A2,SEC61A1	&SEC61A2,SEC61A1&Similar to Sec61a2: Protein transport protein Sec61 subunit alpha isoform 2 (Mus musculus OX=10090)
	G3	bf_00017445	0	0.202773	0.3	0.163	0	CALCOCO1	&&Similar to CALCOCO1: Calcium-binding and coiled-coil domain-containing protein 1 (Homo sapiens OX=9606)
	G3	bf_00002860	0	0.202767	0.246	0.089	0	MYC	&MYC&Similar to MYC: Myc proto-oncogene protein (Tupaia glis OX=9395)
	G3	bf_00007155	0	0.202087	0.367	0.259	0	MGAT1	&MGAT1&Similar to Mgat1: Alpha-1,3-mannosyl-glycoprotein 2-beta-N-acetylglucosaminyltransferase (Rattus norvegicus OX=10116)
	G3	bf_00000389	0	0.201861	0.315	0.215	0	SAMD4A	&SAMD4A&Similar to Samd4a: Protein Smaug homolog 1 (Mus musculus OX=10090)
	G3	bf_00018161	0	0.201699	0.384	0.31	0	ARHGEF9,SPATA13,ARHGEF4	&ARHGEF9,SPATA13,ARHGEF4&Similar to SPATA13: Spermatogenesis-associated protein 13 (Homo sapiens OX=9606)
	G3	bf_00020017	0	0.201465	0.21	0.047	0	H2AFX	&&Similar to H2AFX: Histone H2AX (Homo sapiens OX=9606)
	G3	bf_00006728	0	0.200158	0.231	0.038	0	Pax2_5_8	Pax2_5_8&PAX8,PAX5,PAX2&Similar to PAX2: Paired box protein Pax-2 (Homo sapiens OX=9606)
	G3	bf_00020274	0	0.20013	0.401	0.366	0	CHD4,CHD5,CHD3	&CHD4,CHD5,CHD3&Similar to Chd5: Chromodomain-helicase-DNA-binding protein 5 (Mus musculus OX=10090)
	G3	bf_00008684	0	0.199939	0.305	0.206	0	PRICKLE3,PRICKLE2	&PRICKLE3,PRICKLE2&Similar to PRICKLE2: Prickle-like protein 2 (Homo sapiens OX=9606)
	G3	bf_00014394	0	0.19981	0.301	0.221	0	NHSL1	&NHSL1&Similar to NHS: Nance-Horan syndrome protein (Homo sapiens OX=9606)
	G3	bf_00000368	0	0.199605	0.258	0.057	0	PRPF39	&PRPF39&Similar to PRPF39: Pre-mRNA-processing factor 39 (Homo sapiens OX=9606)
	G3	bf_00000742	0	0.199415	0.317	0.187	0	PAPOLG,PAPOLB,PAPOLA	&PAPOLG,PAPOLB,PAPOLA&Similar to Papolg: Poly(A) polymerase gamma (Mus musculus OX=10090)
	G3	bf_00003323	0	0.198806	0.227	0.051	0	AP2	AP2&TFAP2A&Similar to tfap2e: Transcription factor AP-2-epsilon (Xenopus laevis OX=8355)
	G3	bf_00016355	0	0.198011	0.234	0.034	0	WDY	&&Similar to WDY: WD repeat-containing protein on Y chromosome (Culex quinquefasciatus OX=7176)
	G3	bf_00016384	0	0.197826	0.366	0.263	0	UNC119B,UNC119	&UNC119B,UNC119&Similar to Unc119b: Protein unc-119 homolog B (Mus musculus OX=10090)
	G3	bf_00002719	0	0.1977	0.168	0.007	0	OTP	&OTP&Similar to otp: Homeobox protein orthopedia (Saccoglossus kowalevskii OX=10224)
	G3	bf_00015414	0	0.197287	0.302	0.172	0	TOB1	&TOB1&Similar to TOB2: Protein Tob2 (Homo sapiens OX=9606)
	G3	bf_00003651	0	0.197129	0.223	0.047	0	tpmt	&&Similar to tpmt: Probable thiopurine S-methyltransferase (Danio rerio OX=7955)
	G3	bf_00001715	0	0.196883	0.222	0.035	0	SoxB1a	SoxB1a&&Similar to SOX2: Transcription factor SOX-2 (Gallus gallus OX=9031)
	G3	bf_00024867	0	0.196584	0.255	0.102	0	ASPH	&ASPH&Similar to ASPH: Aspartyl/asparaginyl beta-hydroxylase (Homo sapiens OX=9606)
	G3	bf_00020248	0	0.196523	0.213	0.071	0	SKI	&SKI&Similar to ski: Ski oncogene (Xenopus laevis OX=8355)
	G3	bf_00007790	0	0.195973	0.194	0.016	0	REXO4	&REXO4&Similar to REXO4: RNA exonuclease 4 (Homo sapiens OX=9606)
	G3	bf_00017479	0	0.195958	0.234	0.036	0	LRWD1	&LRWD1&Similar to lrwd1: Leucine-rich repeat and WD repeat-containing protein 1 (Xenopus tropicalis OX=8364)
	G3	bf_00003048	0	0.195783	0.218	0.029	0	PRMT8	&&Similar to PRMT8: Protein arginine N-methyltransferase 8 (Homo sapiens OX=9606)
	G3	bf_00010111	0	0.195679	0.246	0.07	0	DOK4,DOK6,DOK5	&DOK4,DOK6,DOK5&Similar to DOK6: Docking protein 6 (Homo sapiens OX=9606)
	G3	bf_00017941	0	0.194206	0.242	0.032	0	Flnb	&&Similar to Flnb: Filamin-B (Mus musculus OX=10090)
	G3	bf_00000590	0	0.194186	0.215	0.049	0	gss	&&Similar to gss: Glutathione synthetase (Xenopus laevis OX=8355)
	G3	bf_00002140	0	0.193768	0.262	0.083	0	KHDC4	&KHDC4&Similar to KHDC4: KH homology domain-containing protein 4 (Homo sapiens OX=9606)
	G3	bf_00010403	0	0.193436	0.268	0.083	0	Kifc3	&&Similar to Kifc3: Kinesin-like protein KIFC3 (Mus musculus OX=10090)
	G3	bf_00013452	0	0.193432	0.211	0.03	0	RBR	&&Similar to RBR: Retinoblastoma-related protein (Physcomitrella patens subsp. patens OX=3218)
	G3	bf_00023066	0	0.192748	0.215	0.01	0	drpr	&&Similar to drpr: Protein draper (Drosophila melanogaster OX=7227)
	G3	bf_00012465	0	0.19258	0.216	0.085	0	SFRP2	&&Similar to SFRP2: Secreted frizzled-related protein 2 (Gallus gallus OX=9031)
	G3	bf_00025364	0	0.19249	0.228	0.023	0	ABSDF1408	&&Similar to ABSDF1408: Probable 5-dehydro-4-deoxyglucarate dehydratase (Acinetobacter baumannii (strain SDF) OX=509170)
	G3	bf_00026204	0	0.192488	0.233	0.058	0	BZW1	&&Similar to BZW1: Basic leucine zipper and W2 domain-containing protein 1 (Gallus gallus OX=9031)
	G3	bf_00015836	0	0.192306	0.398	0.335	0	PLK5,PLK1	&PLK5,PLK1&Similar to plk1: Serine/threonine-protein kinase PLK1 (Xenopus tropicalis OX=8364)
	G3	bf_00025833	0	0.191254	0.226	0.048	0	B3GALT1	&&Similar to B3GALT1: Beta-1,3-galactosyltransferase 1 (Pongo pygmaeus OX=9600)
	G3	bf_00022632	0	0.190869	0.226	0.025	0	yejO	&&Similar to yejO: Putative uncharacterized outer membrane protein YejO (Escherichia coli (strain K12) OX=83333)
	G3	bf_00018057	0	0.190865	0.245	0.038	0	KPNA3,KPNA4	&KPNA3,KPNA4&Similar to Kpna4: Importin subunit alpha-3 (Mus musculus OX=10090)
	G3	bf_00003195	0	0.190651	0.323	0.211	0	ELL,ELL2	&ELL,ELL2&Similar to Ell2: RNA polymerase II elongation factor ELL2 (Mus musculus OX=10090)
	G3	bf_00002349	0	0.189785	0.219	0.032	0	TPM	&&Similar to TPM: Tropomyosin (Branchiostoma belcheri OX=7741)
	G3	bf_00000272	0	0.189696	0.21	0.076	0	Otx	Otx&OTX2,OTX1&Similar to otx2-b: Homeobox protein OTX2-B (Xenopus laevis OX=8355)
	G3	bf_00001869	0	0.189592	0.37	0.298	0	FBXO11	&FBXO11&Similar to Fbxo11: F-box only protein 11 (Mus musculus OX=10090)
	G3	bf_00024052	0	0.18955	0.217	0.024	0	Type III intermediate filament	&&Similar to Type III intermediate filament (Tetronarce californica OX=7787)
	G3	bf_00019037	0	0.189121	0.233	0.054	0	MIMI_R571	&&Similar to MIMI_R571: Uncharacterized protein R571 (Acanthamoeba polyphaga mimivirus OX=212035)
	G3	bf_00007666	0	0.188807	0.218	0.052	0	Orct	&&Similar to Orct: Organic cation transporter protein (Drosophila melanogaster OX=7227)
	G3	bf_00002095	0	0.188738	0.277	0.105	0	HNRNPK	&HNRNPK&Similar to HNRNPK: Heterogeneous nuclear ribonucleoprotein K (Pongo abelii OX=9601)
	G3	bf_00024990	0	0.188526	0.201	0.007	0	ZBTB9	&ZBTB9&Similar to Zbtb8a: Zinc finger and BTB domain-containing protein 8A (Mus musculus OX=10090)
	G3	bf_00004690	0	0.188366	0.269	0.128	0	PUF60	&PUF60&Similar to Puf60: Poly(U)-binding-splicing factor PUF60 (Rattus norvegicus OX=10116)
	G3	bf_00024348	0	0.188282	0.228	0.071	0	ANO3,ANO4,ANO5	&ANO3,ANO4,ANO5&Similar to ANO4: Anoctamin-4 (Homo sapiens OX=9606)
	G3	bf_00023256	0	0.188274	0.277	0.173	0	SLC4A1,SLC4A2,SLC4A3	&SLC4A1,SLC4A2,SLC4A3&Similar to Slc4a2: Anion exchange protein 2 (Mus musculus OX=10090)
	G3	bf_00022811	0	0.187978	0.216	0.05	0	Chrna9	&&Similar to Chrna9: Neuronal acetylcholine receptor subunit alpha-9 (Rattus norvegicus OX=10116)
	G3	bf_00009320	0	0.187895	0.223	0.034	0	BCL2L2-PABPN1,PABPN1	&BCL2L2-PABPN1,PABPN1&Similar to PABPN1: Polyadenylate-binding protein 2 (Bos taurus OX=9913)
	G3	bf_00001675	0	0.187221	0.372	0.286	0	ZNF106	&ZNF106&Similar to ZNF106: Zinc finger protein 106 (Homo sapiens OX=9606)
	G3	bf_00010136	0	0.187179	0.276	0.111	0	RBM39	&RBM39&Similar to RBM39: RNA-binding protein 39 (Pongo abelii OX=9601)
	G3	bf_00023198	0	0.187168	0.218	0.017	0	PAXBP1	&&Similar to PAXBP1: PAX3- and PAX7-binding protein 1 (Homo sapiens OX=9606)
	G3	bf_00011920	0	0.186201	0.284	0.155	0	NPDC1	&NPDC1&Similar to NPDC1: Neural proliferation differentiation and control protein 1 (Homo sapiens OX=9606)
	G3	bf_00007117	0	0.185765	0.274	0.155	0	Megf10	&&Similar to Megf10: Multiple epidermal growth factor-like domains protein 10 (Mus musculus OX=10090)
	G3	bf_00003006	0	0.185606	0.218	0.024	0	NEFM	&&Similar to NEFM: Neurofilament medium polypeptide (Gallus gallus OX=9031)
	G3	bf_00008147	0	0.185516	0.221	0.037	0	RBM5,RBM10	&RBM5,RBM10&Similar to RBM5: RNA-binding protein 5 (Homo sapiens OX=9606)
	G3	bf_00020605	0	0.185306	0.447	0.455	0	Pom121	&&Similar to Pom121: Nuclear envelope pore membrane protein POM 121 (Mus musculus OX=10090)
	G3	bf_00013140	0	0.185207	0.465	0.469	0	HMGB2,HMGB1,HMGB3	&HMGB2,HMGB1,HMGB3&Similar to Dsp1: High mobility group protein DSP1 (Drosophila melanogaster OX=7227)
	G3	bf_00011724	0	0.184441	0.304	0.16	0	Zfp26	&&Similar to Zfp26: Zinc finger protein 26 (Mus musculus OX=10090)
	G3	bf_00025407	0	0.183946	0.249	0.101	0	DYRK4	&DYRK4&Similar to Dyrk4: Dual specificity tyrosine-phosphorylation-regulated kinase 4 (Mus musculus OX=10090)
	G3	bf_00018634	0	0.183169	0.384	0.337	0	ATP1B1,ATP1B2,ATP1B3,ATP1B4	&ATP1B1,ATP1B2,ATP1B3,ATP1B4&Similar to Sodium/potassium-transporting ATPase subunit beta-1 (Rhinella marina OX=8386)
	G3	bf_00024342	0	0.182758	0.191	0.009	0	Tmprss15	&&Similar to Tmprss15: Enteropeptidase (Mus musculus OX=10090)
	G3	bf_00014447	0	0.182422	0.442	0.416	0	PF13_0198	&&Similar to PF13_0198: Reticulocyte-binding protein 2 homolog a (Plasmodium falciparum (isolate 3D7) OX=36329)
	G3	bf_00025993	0	0.182295	0.176	0.013	0	Kunitz-type serine protease inhibitor Hg1	&&Similar to Kunitz-type serine protease inhibitor Hg1 (Hoffmannihadrurus gertschi OX=380989)
	G3	bf_00012238	0	0.182237	0.177	0.015	0	Lhx3	Lhx3&LHX3,LHX4&Similar to LHX3: LIM/homeobox protein Lhx3 (Gallus gallus OX=9031)
	G3	bf_00009562	0	0.181225	0.369	0.379	0	GSE1	&GSE1&Similar to gse1: Genetic suppressor element 1 (Danio rerio OX=7955)
	G3	bf_00006207	0	0.179602	0.281	0.149	0	BMPR1B,BMPR1A	&BMPR1B,BMPR1A&Similar to BMPR1B: Bone morphogenetic protein receptor type-1B (Gallus gallus OX=9031)
	G3	bf_00001182	0	0.179527	0.319	0.227	0	HECTD1	&HECTD1&Similar to HECTD1: E3 ubiquitin-protein ligase HECTD1 (Homo sapiens OX=9606)
	G3	bf_00008829	0	0.17907	0.24	0.045	0	KDM7A,PHF8	&KDM7A,PHF8&Similar to phf8: Histone lysine demethylase PHF8 (Danio rerio OX=7955)
	G3	bf_00020719	0	0.179039	0.415	0.372	0	DVL1,DVL2,DVL3	&DVL1,DVL2,DVL3&Similar to dvl3: Segment polarity protein dishevelled homolog DVL-3 (Xenopus tropicalis OX=8364)
	G3	bf_00025024	0	0.177157	0.583	0.588	0	BTG3,BTG4	&BTG3,BTG4&Similar to Btg4: Protein BTG4 (Mus musculus OX=10090)
	G3	bf_00004401	0	0.177028	0.392	0.346	0	SRSF7	&SRSF7&Similar to SRSF7: Serine/arginine-rich splicing factor 7 (Bos taurus OX=9913)
	G3	bf_00008979	0	0.176889	0.428	0.399	0	HCFC2,HCFC1	&HCFC2,HCFC1&Similar to HCFC1: Host cell factor 1 (Mesocricetus auratus OX=10036)
	G3	bf_00000085	0	0.176548	0.221	0.05	0	ddl	&&Similar to ddl: D-alanine--D-alanine ligase (Corynebacterium efficiens (strain DSM 44549 / YS-314 / AJ 12310 / JCM 11189 / NBRC 100395) OX=196164)
	G3	bf_00015298	0	0.176248	0.251	0.089	0	ANKFN1	&ANKFN1&Similar to ANKFN1: Ankyrin repeat and fibronectin type-III domain-containing protein 1 (Homo sapiens OX=9606)
	G3	bf_00002567	0	0.176227	0.157	0.014	0	Riboflavin-binding protein	&&Similar to Riboflavin-binding protein (Gallus gallus OX=9031)
	G3	bf_00021743	0	0.176151	0.279	0.168	0	GOLGA4	&GOLGA4&Similar to GOLGA4: Golgin subfamily A member 4 (Homo sapiens OX=9606)
	G3	bf_00016658	0	0.175551	0.252	0.083	0	PF11_0240	&&Similar to PF11_0240: Dynein heavy chain-like protein PF11_0240 (Plasmodium falciparum (isolate 3D7) OX=36329)
	G3	bf_00014944	0	0.175519	0.252	0.102	0	PC3-like endoprotease variant B	&&Similar to PC3-like endoprotease variant B (Hydra vulgaris OX=6087)
	G3	bf_00025783	0	0.175408	0.247	0.089	0	ACVR2B,ACVR2A	&ACVR2B,ACVR2A&Similar to acvr2b: Activin receptor type-2B (Xenopus laevis OX=8355)
	G3	bf_00009749	0	0.174725	0.191	0.047	0	Scrt1	&&Similar to Scrt1: Transcriptional repressor scratch 1 (Mus musculus OX=10090)
	G3	bf_00008339	0	0.174573	0.255	0.106	0	CDK17,CDK16,CDK18	&CDK17,CDK16,CDK18&Similar to CDK17: Cyclin-dependent kinase 17 (Homo sapiens OX=9606)
	G3	bf_00014901	0	0.174391	0.313	0.223	0	RNF17	&RNF17&Similar to Rnf17: RING finger protein 17 (Mus musculus OX=10090)
	G3	bf_00007271	0	0.173836	0.204	0.025	0	NXPE1	&&Similar to NXPE1: NXPE family member 1 (Oryctolagus cuniculus OX=9986)
	G3	bf_00023501	0	0.173365	0.165	0	0	Lrrc15	&&Similar to Lrrc15: Leucine-rich repeat-containing protein 15 (Mus musculus OX=10090)
	G3	bf_00018223	0	0.17333	0.365	0.311	0	FARP2,FARP1	&FARP2,FARP1&Similar to FARP2: FERM, ARHGEF and pleckstrin domain-containing protein 2 (Homo sapiens OX=9606)
	G3	bf_00009545	0	0.173284	0.315	0.221	0	NCOA5	&NCOA5&Similar to NCOA5: Nuclear receptor coactivator 5 (Homo sapiens OX=9606)
	G3	bf_00009924	0	0.173081	0.289	0.162	0	NUDT21	&NUDT21&Similar to nudt21: Cleavage and polyadenylation specificity factor subunit 5 (Xenopus laevis OX=8355)
	G3	bf_00025834	0	0.172956	0.207	0.023	0	B3GALT1	&&Similar to B3GALT1: Beta-1,3-galactosyltransferase 1 (Pongo pygmaeus OX=9600)
	G3	bf_00008827	0	0.172495	0.268	0.185	0	yfbL	&&Similar to yfbL: Uncharacterized protein YfbL (Escherichia coli (strain K12) OX=83333)
	G3	bf_00021983	0	0.171979	0.282	0.189	0	PTPN3,PTPN4	&PTPN3,PTPN4&Similar to Ptpn4: Tyrosine-protein phosphatase non-receptor type 4 (Mus musculus OX=10090)
	G3	bf_00018194	0	0.171683	0.441	0.452	0	GPC5,GPC3	&GPC5,GPC3&Similar to GPC5: Glypican-5 (Homo sapiens OX=9606)
	G3	bf_00011063	0	0.171487	0.249	0.101	0	ODF2	&ODF2&Similar to ODF2: Outer dense fiber protein 2 (Gallus gallus OX=9031)
	G3	bf_00022208	0	0.171354	0.433	0.393	0	Ddx17	&&Similar to Ddx17: Probable ATP-dependent RNA helicase DDX17 (Mus musculus OX=10090)
	G3	bf_00004602	0	0.170468	0.3	0.185	0	PNPLA2,PNPLA3	&PNPLA2,PNPLA3&Similar to PNPLA2: Patatin-like phospholipase domain-containing protein 2 (Homo sapiens OX=9606)
	G3	bf_00010137	0	0.169638	0.296	0.217	0	CD109	&CD109&Similar to CD109: CD109 antigen (Homo sapiens OX=9606)
	G3	bf_00000119	0	0.169468	0.293	0.225	0	MTR	&MTR&Similar to MTR: Methionine synthase (Bos taurus OX=9913)
	G3	bf_00016846	0	0.169236	0.237	0.093	0	SMTNL2,SMTNL1	&SMTNL2,SMTNL1&Similar to SMTN: Smoothelin (Homo sapiens OX=9606)
	G3	bf_00018630	0	0.16906	0.248	0.119	0	TSPAN6,TSPAN7	&TSPAN6,TSPAN7&Similar to TSPAN7: Tetraspanin-7 (Homo sapiens OX=9606)
	G3	bf_00020704	0	0.168849	0.258	0.125	0	KAZN	&KAZN&Similar to KAZN: Kazrin (Homo sapiens OX=9606)
	G3	bf_00003332	0	0.168748	0.202	0.031	0	LRP6	&&Similar to LRP6: Low-density lipoprotein receptor-related protein 6 (Homo sapiens OX=9606)
	G3	bf_00018858	0	0.168127	0.307	0.21	0	TSC22D3	&TSC22D3&Similar to TSC22D1: TSC22 domain family protein 1 (Macaca fascicularis OX=9541)
	G3	bf_00007693	0	0.168044	0.16	0.01	0	Admp	Admp&&Similar to BMP2: Bone morphogenetic protein 2 (Homo sapiens OX=9606)
	G3	bf_00002546	0	0.167266	0.142	0.015	0	Sox17	Sox17&&Similar to sox7: Transcription factor Sox-7 (Xenopus tropicalis OX=8364)
	G3	bf_00009800	0	0.167203	0.383	0.362	0	CCNE1,CCNE2	&CCNE1,CCNE2&Similar to CYCE: G1/S-specific cyclin-E (Hemicentrotus pulcherrimus OX=7650)
	G3	bf_00016693	0	0.167081	0.526	0.537	0	ATP2A1,ATP2A3,ATP2A2	&ATP2A1,ATP2A3,ATP2A2&Similar to Atp2a1: Sarcoplasmic/endoplasmic reticulum calcium ATPase 1 (Mus musculus OX=10090)
	G3	bf_00005101	0	0.166934	0.412	0.394	0	HIPK1,HIPK2	&HIPK1,HIPK2&Similar to HIPK2: Homeodomain-interacting protein kinase 2 (Homo sapiens OX=9606)
	G3	bf_00022063	0	0.166793	0.204	0.058	0	LRRFIP1,LRRFIP2	&LRRFIP1,LRRFIP2&Similar to Lrrfip2: Leucine-rich repeat flightless-interacting protein 2 (Rattus norvegicus OX=10116)
	G3	bf_00000267	0	0.166631	0.283	0.169	0	POU2F3	&POU2F3&Similar to POU2F1: POU domain, class 2, transcription factor 1 (Sus scrofa OX=9823)
	G3	bf_00009762	0	0.166478	0.251	0.118	0	PMFBP1	&PMFBP1&Similar to Pmfbp1: Polyamine-modulated factor 1-binding protein 1 (Rattus norvegicus OX=10116)
	G3	bf_00015164	0	0.166347	0.257	0.127	0	GRB2	&GRB2&Similar to Grb2: Growth factor receptor-bound protein 2 (Rattus norvegicus OX=10116)
	G3	bf_00019333	0	0.166206	0.209	0.064	0	SOQ1	&&Similar to SOQ1: Protein SUPPRESSOR OF QUENCHING 1, chloroplastic (Arabidopsis thaliana OX=3702)
	G3	bf_00007166	0	0.165951	0.338	0.289	0	ANP32A,ANP32C,ANP32D,ANP32B	&ANP32A,ANP32C,ANP32D,ANP32B&Similar to Anp32a: Acidic leucine-rich nuclear phosphoprotein 32 family member A (Drosophila pseudoobscura pseudoobscura OX=46245)
	G3	bf_00010090	0	0.165754	0.16	0.008	0	F40A3.3	&&Similar to F40A3.3: Phosphatidylethanolamine-binding protein homolog F40A3.3 (Caenorhabditis elegans OX=6239)
	G3	bf_00013658	0	0.165688	0.322	0.237	0	SMARCA1,SMARCA5	&SMARCA1,SMARCA5&Similar to Smarca5: SWI/SNF-related matrix-associated actin-dependent regulator of chromatin subfamily A member 5 (Mus musculus OX=10090)
	G3	bf_00013149	0	0.165127	0.256	0.113	0	APAF1	&APAF1&Similar to APAF1: Apoptotic protease-activating factor 1 (Homo sapiens OX=9606)
	G3	bf_00007270	0	0.164673	0.188	0.017	0	NXPE3	&&Similar to NXPE3: NXPE family member 3 (Homo sapiens OX=9606)
	G3	bf_00013401	0	0.163792	0.557	0.605	0	NUMA1	&NUMA1&Similar to Numa1: Nuclear mitotic apparatus protein 1 (Mus musculus OX=10090)
	G3	bf_00023773	0	0.163644	0.415	0.37	0	TNPO3	&TNPO3&Similar to Tnpo3: Transportin-3 (Mus musculus OX=10090)
	G3	bf_00004191	0	0.163547	0.176	0.006	0	Lim1_5	Lim1_5&LHX5,LHX1&Similar to Lhx1: LIM/homeobox protein Lhx1 (Rattus norvegicus OX=10116)
	G3	bf_00008931	0	0.163211	0.266	0.131	0	DYRK2,DYRK3	&DYRK2,DYRK3&Similar to Dyrk2: Dual specificity tyrosine-phosphorylation-regulated kinase 2 (Mus musculus OX=10090)
	G3	bf_00025952	0	0.163012	0.163	0.012	0	ZEB1,ZEB2	&ZEB1,ZEB2&Similar to ZEB2: Zinc finger E-box-binding homeobox 2 (Homo sapiens OX=9606)
	G3	bf_00013579	0	0.162027	0.166	0.024	0	HBX4	&&Similar to HBX4: Homeobox protein EgHBX4 (Fragment) (Echinococcus granulosus OX=6210)
	G3	bf_00000536	0	0.161059	0.233	0.236	0	delta	delta&DLL1&Similar to Dll1: Delta-like protein 1 (Rattus norvegicus OX=10116)
	G3	bf_00002530	0	0.160427	0.309	0.226	0	DEK	&DEK&Similar to Dek: Protein DEK (Rattus norvegicus OX=10116)
	G3	bf_00003386	0	0.16024	0.17	0.02	0	cheB2	&&Similar to cheB2: Protein-glutamate methylesterase/protein-glutamine glutaminase 2 (Geobacter metallireducens (strain GS-15 / ATCC 53774 / DSM 7210) OX=269799)
	G3	bf_00018123	0	0.160041	0.396	0.354	0	TNIK,MINK1,MAP4K4	&TNIK,MINK1,MAP4K4&Similar to Tnik: Traf2 and NCK-interacting protein kinase (Mus musculus OX=10090)
	G3	bf_00023315	0	0.159814	0.19	0.019	0	CHST3	&&Similar to CHST3: Carbohydrate sulfotransferase 3 (Tetronarce californica OX=7787)
	G3	bf_00007208	0	0.159436	0.342	0.264	0	Chtop	&&Similar to Chtop: Chromatin target of PRMT1 protein (Rattus norvegicus OX=10116)
	G3	bf_00011616	0	0.159091	0.241	0.092	0	IER5L	&IER5L&Similar to ier5l: Immediate early response gene 5-like protein (Danio rerio OX=7955)
	G3	bf_00002776	0	0.158936	0.369	0.345	0	PZP,A2M,A2ML1	&PZP,A2M,A2ML1&Similar to A2m: Alpha-2-macroglobulin-P (Mus musculus OX=10090)
	G3	bf_00008506	0	0.158773	0.19	0.057	0	SLC35C1	&SLC35C1&Similar to Slc35c1: GDP-fucose transporter 1 (Mus musculus OX=10090)
	G3	bf_00013405	0	0.157834	0.36	0.322	0	PCF11	&PCF11&Similar to PCF11: Pre-mRNA cleavage complex 2 protein Pcf11 (Homo sapiens OX=9606)
	G3	bf_00012844	0	0.156297	0.257	0.152	0	JPT2	&&Similar to JPT2: Jupiter microtubule associated homolog 2 (Homo sapiens OX=9606)
	G3	bf_00025476	0	0.155714	0.173	0.029	0	Kbtbd8	&&Similar to Kbtbd8: Kelch repeat and BTB domain-containing protein 8 (Mus musculus OX=10090)
	G3	bf_00017400	0	0.155415	0.183	0.01	0	Pkd1l3	&&Similar to Pkd1l3: Polycystic kidney disease protein 1-like 3 (Mus musculus OX=10090)
	G3	bf_00002104	0	0.155289	0.237	0.085	0	APBA3,APBA2,APBA1	&APBA3,APBA2,APBA1&Similar to Apba1: Amyloid-beta A4 precursor protein-binding family A member 1 (Rattus norvegicus OX=10116)
	G3	bf_00004582	0	0.155179	0.239	0.095	0	Etv6	&&Similar to Etv6: Transcription factor ETV6 (Mus musculus OX=10090)
	G3	bf_00022687	0	0.153781	0.198	0.045	0	FZD5,FZD8	&FZD5,FZD8&Similar to fzd8: Frizzled-8 (Xenopus laevis OX=8355)
	G3	bf_00013297	0	0.152765	0.201	0.084	0	INF2	&INF2&Similar to Fhdc1: FH2 domain-containing protein 1 (Mus musculus OX=10090)
	G3	bf_00015365	0	0.152462	0.463	0.472	0	SMURF1,SMURF2	&SMURF1,SMURF2&Similar to smurf2: E3 ubiquitin-protein ligase SMURF2 (Xenopus laevis OX=8355)
	G3	bf_00018649	0	0.152273	0.645	0.702	0	TRIP12	&TRIP12&Similar to Trip12: E3 ubiquitin-protein ligase TRIP12 (Rattus norvegicus OX=10116)
	G3	bf_00017796	0	0.152216	0.204	0.087	0	MCF2,MCF2L	&MCF2,MCF2L&Similar to Mcf2l: Guanine nucleotide exchange factor DBS (Rattus norvegicus OX=10116)
	G3	bf_00011815	0	0.152167	0.59	0.638	0	BRD2,BRDT,BRD4,BRD3	&BRD2,BRDT,BRD4,BRD3&Similar to BRD2: Bromodomain-containing protein 2 (Homo sapiens OX=9606)
	G3	bf_00002507	0	0.151179	0.199	0.04	0	rph	&&Similar to rph: Ribonuclease PH (Leifsonia xyli subsp. xyli (strain CTCB07) OX=281090)
	G3	bf_00019930	0	0.151036	0.243	0.148	0	TMEM59	&TMEM59&Similar to TMEM59: Transmembrane protein 59 (Homo sapiens OX=9606)
	G3	bf_00006478	0	0.150397	0.194	0.053	0	SYT1	&&Similar to SYT1: Synaptotagmin-1 (Aplysia californica OX=6500)
	G3	bf_00004693	0	0.150279	0.195	0.039	0	INPP5A	&INPP5A&Similar to INPP5A: Type I inositol 1,4,5-trisphosphate 5-phosphatase (Homo sapiens OX=9606)
	G3	bf_00012702	0	0.150212	0.154	0.017	0	slc6a9	&&Similar to slc6a9: Sodium- and chloride-dependent glycine transporter 1 (Xenopus laevis OX=8355)
	G3	bf_00010586	4.94065645841247e-324	0.162721	0.279	0.157	1.20601424149848e-319	FH13	&&Similar to FH13: Formin-like protein 13 (Arabidopsis thaliana OX=3702)
	G3	bf_00025354	4.94065645841247e-324	0.15702	0.221	0.096	1.20601424149848e-319	DCDC2,DCDC2B	&DCDC2,DCDC2B&Similar to Dcdc2: Doublecortin domain-containing protein 2 (Mus musculus OX=10090)
	G3	bf_00007442	4.94065645841247e-324	0.153031	0.345	0.289	1.20601424149848e-319	KIF23	&KIF23&Similar to KIF23: Kinesin-like protein KIF23 (Homo sapiens OX=9606)
	G3	bf_00005522	1.03259719980821e-321	0.163133	0.294	0.194	2.52056976473183e-317	Paip2b	&&Similar to Paip2b: Polyadenylate-binding protein-interacting protein 2B (Mus musculus OX=10090)
	G3	bf_00017218	2.70747973921003e-321	0.161422	0.211	0.085	6.60895804341169e-317	CHFR	&CHFR&Similar to Chfr: E3 ubiquitin-protein ligase CHFR (Mus musculus OX=10090)
	G3	bf_00010609	7.56414503782948e-321	0.169027	0.319	0.22	1.84640780373418e-316	ACIN1	&ACIN1&Similar to Acin1: Apoptotic chromatin condensation inducer in the nucleus (Mus musculus OX=10090)
	G3	bf_00025267	3.93226847525048e-320	0.155267	0.26	0.132	9.59866734808642e-316	14-3-3zeta	&&Similar to 14-3-3zeta: 14-3-3 protein zeta (Bombyx mori OX=7091)
	G3	bf_00013749	7.47669541851558e-320	0.155821	0.274	0.175	1.82506135165965e-315	Ice2	&&Similar to Ice2: Little elongation complex subunit 2 (Mus musculus OX=10090)
	G3	bf_00026316	4.43693775798277e-317	0.152431	0.227	0.104	1.08305650672359e-312	ACE	&&Similar to ACE: Angiotensin-converting enzyme (Homo sapiens OX=9606)
	G3	bf_00002043	4.28208488708903e-316	0.150432	0.25	0.123	1.04525692093843e-311	RAI14,ANKRD24	&RAI14,ANKRD24&Similar to ANKRD24: Ankyrin repeat domain-containing protein 24 (Homo sapiens OX=9606)
	G3	bf_00012942	5.03321110982515e-316	0.152477	0.333	0.277	1.22860683190832e-311	SHROOM2	&SHROOM2&Similar to shroom2: Protein Shroom2 (Xenopus tropicalis OX=8364)
	G3	bf_00014702	3.8456660797703e-312	0.166012	0.192	0.09	9.38727e-308	MAP3K5,MAP3K15,MAP3K6	&MAP3K5,MAP3K15,MAP3K6&Similar to MAP3K15: Mitogen-activated protein kinase kinase kinase 15 (Homo sapiens OX=9606)
	G3	bf_00021739	0	0.158626	0.376	0.317	2.97125e-305	RACGAP1	&RACGAP1&Similar to RACGAP1: Rac GTPase-activating protein 1 (Homo sapiens OX=9606)
	G3	bf_00021867	6.07992e-308	0.159607	0.336	0.266	1.48411e-303	ITGA6,ITGA7	&ITGA6,ITGA7&Similar to ITGA6: Integrin alpha-6 (Gallus gallus OX=9031)
	G3	bf_00012614	5.00853e-305	0.171698	0.331	0.224	1.22258e-300	OGT	&OGT&Similar to OGT: UDP-N-acetylglucosamine--peptide N-acetylglucosaminyltransferase 110 kDa subunit (Homo sapiens OX=9606)
	G3	bf_00012703	2.73506e-297	0.168277	0.327	0.261	6.67627e-293	Slc6a5	&&Similar to Slc6a5: Sodium- and chloride-dependent glycine transporter 2 (Mus musculus OX=10090)
	G3	bf_00014008	4.28488e-297	0.15833	0.304	0.21	1.04594e-292	optn	&&Similar to optn: Optineurin (Danio rerio OX=7955)
	G3	bf_00014388	5.46834e-294	0.158563	0.245	0.119	1.33482e-289	CTSV,CTSL,CTSS	&CTSV,CTSL,CTSS&Similar to Cp1: Cathepsin L (Drosophila melanogaster OX=7227)
	G3	bf_00000409	7.39406e-293	0.155648	0.291	0.192	1.80489e-288	RBM25	&RBM25&Similar to Rbm25: RNA-binding protein 25 (Mus musculus OX=10090)
	G3	bf_00023957	6.36469e-289	0.157485	0.284	0.223	1.55362e-284	DENND5A,DENND5B	&DENND5A,DENND5B&Similar to DENND5B: DENN domain-containing protein 5B (Homo sapiens OX=9606)
	G3	bf_00014345	1.26841e-288	0.153462	0.243	0.162	3.0962e-284	POU5F1,POU5F1B,POU5F2	&POU5F1,POU5F1B,POU5F2&Similar to SGF3: Silk gland factor 3 (Bombyx mori OX=7091)
	G3	bf_00008303	8.03827e-280	0.151709	0.357	0.288	1.96214e-275	RAP1A,RAP1B	&RAP1A,RAP1B&Similar to rap1b: Ras-related protein Rap-1b (Danio rerio OX=7955)
	G3	bf_00024821	2.85106e-259	0.1731	0.287	0.182	6.95943e-255	NPC1L1,NPC1	&NPC1L1,NPC1&Similar to NPC1: NPC intracellular cholesterol transporter 1 (Sus scrofa OX=9823)
