# Supplementary material for: Joint profiling of gene expression and chromatin accessibility of amphioxus development at single cell resolution
Source: Research Square preprint supplement (doi:10.21203/rs.3.rs-504113/v1), 2021-05-18
Supplement: Supplementary file 9 [file 56f574f3d206a036f93d9f11.xlsx]

## Sheet: sheet1
	Supplementary Table 4. Top genes identified for each lineage by scRNA and scATAC data intergration.
	lineage	ID	chr	start	end	Note	strand	Gene_name	anno_human	TF
	Endoderm	bf_00005799	Chr2	29859993	29889164	Similar to hhex: Hematopoietically-expressed homeobox protein hhex (Xenopus laevis OX=8355)	-	hhex	HHEX	TRUE
	Endoderm	bf_00008625	Chr4	15130331	15224271	Similar to PDZRN3: E3 ubiquitin-protein ligase PDZRN3 (Homo sapiens OX=9606)	-	PDZRN3	PDZRN3,PDZD4,PDZRN4	FALSE
	Endoderm	bf_00010090	Chr8	12922774	12967391	Similar to F40A3.3: Phosphatidylethanolamine-binding protein homolog F40A3.3 (Caenorhabditis elegans OX=6239)	+	F40A3.3		FALSE
	Endoderm	bf_00012371	Chr6	2321853	2359269	Similar to slc6a9: Sodium- and chloride-dependent glycine transporter 1 (Xenopus laevis OX=8355)	+	slc6a9		FALSE
	Endoderm	bf_00012465	Chr6	3475288	3487833	Similar to SFRP2: Secreted frizzled-related protein 2 (Gallus gallus OX=9031)	-	SFRP2		FALSE
	Endoderm	bf_00012702	Chr6	8100445	8131616	Similar to slc6a9: Sodium- and chloride-dependent glycine transporter 1 (Xenopus laevis OX=8355)	+	slc6a9		FALSE
	Endoderm	bf_00016098	Chr9	18258822	18310782	Similar to OLFM1: Noelin (Homo sapiens OX=9606)	+	OLFM1		FALSE
	Endoderm	bf_00019196	Chr15	4736632	4852027	Similar to Lar: Tyrosine-protein phosphatase Lar (Drosophila melanogaster OX=7227)	-	Lar	PTPRS,PTPRD,PTPRF	FALSE
	Endoderm	bf_00020681	Chr11	9184321	9199446	Similar to HMCN1: Hemicentin-1 (Homo sapiens OX=9606)	-	HMCN1		FALSE
	Endoderm	bf_00021568	Chr14	3986619	4013952	Similar to crtac1: Cartilage acidic protein 1 (Xenopus tropicalis OX=8364)	+	crtac1		FALSE
	Endoderm	bf_00002859	Chr1	14173644	14211530	Similar to Trit1: tRNA dimethylallyltransferase (Mus musculus OX=10090)	-	Trit1	TRIT1	FALSE
	Endoderm	bf_00012496	Chr6	4283115	4342980	Similar to DACH1: Dachshund homolog 1 (Homo sapiens OX=9606)	-	DACH1	DACH2,DACH1	FALSE
	Endoderm	bf_00023807	Chr18	6544954	6558980	Similar to MIMI_L256: Uncharacterized protein L256 (Acanthamoeba polyphaga mimivirus OX=212035)	+	MIMI_L256		FALSE
	Endoderm	bf_00024181	Chr18	14282254	14296644	Similar to SLC6A15: Sodium-dependent neutral amino acid transporter B(0)AT2 (Bos taurus OX=9913)	-	SLC6A15		FALSE
	Endoderm	bf_00005732	Chr2	28708965	28740207	Similar to FGFRL1: Fibroblast growth factor receptor-like 1 (Gallus gallus OX=9031)	+	FGFRL1	FGFRL1	FALSE
	Endoderm	bf_00005970	Chr2	33278830	33331438	Similar to CYP26A1: Cytochrome P450 26A1 (Gallus gallus OX=9031)	+	CYP26A1		FALSE
	Endoderm	bf_00006452	Chr1620	9020305	9035881	Similar to DMBX1: Diencephalon/mesencephalon homeobox protein 1 (Gallus gallus OX=9031)	+	DMBX1	DMBX1	TRUE
	Endoderm	bf_00013634	Chr6	25218665	25312180	Similar to FAT4: Protocadherin Fat 4 (Homo sapiens OX=9606)	-	FAT4	FAT4	FALSE
	Epithelial ectoderm	bf_00001974	Chr3	33511373	33579337	Similar to Syne1: Nesprin-1 (Mus musculus OX=10090)	-	Syne1		FALSE
	Epithelial ectoderm	bf_00002335	Chr1	6061479	6069926	Similar to THIO: Thioredoxin (Geodia cydonium OX=6047)	-	THIO		FALSE
	Epithelial ectoderm	bf_00003323	Chr1	21194146	21225644	Similar to tfap2e: Transcription factor AP-2-epsilon (Xenopus laevis OX=8355)	-	tfap2e	TFAP2A	TRUE
	Epithelial ectoderm	bf_00003997	Chr2	744072	795276	Similar to Hgf: Hepatocyte growth factor (Rattus norvegicus OX=10116)	-	Hgf		FALSE
	Epithelial ectoderm	bf_00003998	Chr2	804453	842695	Similar to bzw1a: Basic leucine zipper and W2 domain-containing protein 1-A (Danio rerio OX=7955)	-	bzw1a		FALSE
	Epithelial ectoderm	bf_00005632	Chr2	26992708	27005487	Similar to EIF5A: Eukaryotic translation initiation factor 5A-1 (Oryctolagus cuniculus OX=9986)	+	EIF5A		TRUE
	Epithelial ectoderm	bf_00005738	Chr2	28849188	28882618	Similar to CAPN9: Calpain-9 (Homo sapiens OX=9606)	+	CAPN9	CAPN14	FALSE
	Epithelial ectoderm	bf_00006094	Chr1620	2899230	3069267	Similar to KIRREL3: Kin of IRRE-like protein 3 (Homo sapiens OX=9606)	+	KIRREL3		FALSE
	Epithelial ectoderm	bf_00006354	Chr1620	7452382	7463852	Similar to PF13_0198: Reticulocyte-binding protein 2 homolog a (Plasmodium falciparum (isolate 3D7) OX=36329)	+	PF13_0198		FALSE
	Epithelial ectoderm	bf_00006550	Chr1620	10913183	10977803	Similar to TASOR: Protein TASOR (Homo sapiens OX=9606)	-	TASOR		FALSE
	Epithelial ectoderm	bf_00006577	Chr1620	11541681	11549471	Similar to prfB: Peptide chain release factor 2 (Nitratiruptor sp. (strain SB155-2) OX=387092)	+	prfB		FALSE
	Epithelial ectoderm	bf_00006853	Chr1620	17205900	17212324	Similar to PF13_0198: Reticulocyte-binding protein 2 homolog a (Plasmodium falciparum (isolate 3D7) OX=36329)	-	PF13_0198		FALSE
	Epithelial ectoderm	bf_00007216	Chr1620	22612846	22633575	Similar to Ece1: Endothelin-converting enzyme 1 (Rattus norvegicus OX=10116)	-	Ece1		FALSE
	Epithelial ectoderm	bf_00007492	Chr1620	28671598	28803202	Similar to RBPMS2: RNA-binding protein with multiple splicing 2 (Gallus gallus OX=9031)	-	RBPMS2	RBPMS2,RBPMS	FALSE
	Epithelial ectoderm	bf_00007516	Chr1620	29393580	29438658	Similar to Svep1: Sushi, von Willebrand factor type A, EGF and pentraxin domain-containing protein 1 (Mus musculus OX=10090)	-	Svep1		FALSE
	Epithelial ectoderm	bf_00007539	Chr1620	29781924	29789719	Similar to TECB: Tectonin-2 (Physarum polycephalum OX=5791)	-	TECB		FALSE
	Epithelial ectoderm	bf_00009906	Chr8	9783654	9798922	Similar to AHNAK: Neuroblast differentiation-associated protein AHNAK (Homo sapiens OX=9606)	+	AHNAK		FALSE
	Epithelial ectoderm	bf_00010279	Chr8	15861231	15880389	Similar to ESRP1: Epithelial splicing regulatory protein 1 (Homo sapiens OX=9606)	-	ESRP1	ESRP1,ESRP2	FALSE
	Epithelial ectoderm	bf_00013452	Chr6	21237581	21244373	Similar to RBR: Retinoblastoma-related protein (Physcomitrella patens subsp. patens OX=3218)	+	RBR		FALSE
	Epithelial ectoderm	bf_00013956	Chr12	5635043	5644678	Similar to Lrrcc1: Leucine-rich repeat and coiled-coil domain-containing protein 1 (Mus musculus OX=10090)	-	Lrrcc1		FALSE
	Epithelial ectoderm	bf_00014085	Chr12	7494301	7503405	Similar to SEMG1: Semenogelin-1 (Homo sapiens OX=9606)	-	SEMG1		FALSE
	Epithelial ectoderm	bf_00014304	Chr12	11586901	11671810	Similar to PKHD1L1: Fibrocystin-L (Homo sapiens OX=9606)	-	PKHD1L1		FALSE
	Epithelial ectoderm	bf_00014329	Chr12	12141735	12199396	Similar to Pkhd1l1: Fibrocystin-L (Mus musculus OX=10090)	+	Pkhd1l1		FALSE
	Epithelial ectoderm	bf_00014370	Chr12	12943062	12954516	Similar to MYH13: Myosin-13 (Homo sapiens OX=9606)	-	MYH13		FALSE
	Epithelial ectoderm	bf_00014461	Chr12	14541982	14564227	Similar to LAMB1: Laminin subunit beta-1 (Homo sapiens OX=9606)	-	LAMB1		FALSE
	Epithelial ectoderm	bf_00014664	Chr12	18020680	18039145	Similar to Cntn3: Contactin-3 (Mus musculus OX=10090)	+	Cntn3	CNTN2,CNTN1,CNTN6,CNTN4,CNTN3,CNTN5	FALSE
	Epithelial ectoderm	bf_00014667	Chr12	18066116	18110332	Similar to CNTN2: Contactin-2 (Gallus gallus OX=9031)	+	CNTN2		FALSE
	Epithelial ectoderm	bf_00014855	Chr12	21572270	21658290	Similar to ada: Adenosine deaminase (Xenopus laevis OX=8355)	+	ada		FALSE
	Epithelial ectoderm	bf_00014866	Chr12	21847461	21848356	Similar to UPF0602 protein C4orf47 homolog (Mus musculus OX=10090)	-	UPF0602 protein C4orf47 homolog		FALSE
	Epithelial ectoderm	bf_00015528	Chr9	8993535	9048191	Similar to Mucin-like protein (Fragment) (Acropora millepora OX=45264)	-	Mucin-like protein		FALSE
	Epithelial ectoderm	bf_00017400	Chr5	17354435	17370476	Similar to Pkd1l3: Polycystic kidney disease protein 1-like 3 (Mus musculus OX=10090)	-	Pkd1l3		FALSE
	Epithelial ectoderm	bf_00018179	Chr10	8906116	8951722	Similar to Calmodulin-B (Halocynthia roretzi OX=7729)	-	Calmodulin-B		FALSE
	Epithelial ectoderm	bf_00018346	Chr10	11485135	11518886	Similar to cher: Filamin-A (Drosophila melanogaster OX=7227)	-	cher		FALSE
	Epithelial ectoderm	bf_00018379	Chr10	12106363	12117578	Similar to HABP2: Hyaluronan-binding protein 2 (Homo sapiens OX=9606)	+	HABP2		FALSE
	Epithelial ectoderm	bf_00021100	Chr11	16006470	16075689	Similar to CROCC: Rootletin (Homo sapiens OX=9606)	+	CROCC	CEP250,CROCC2,CROCC	FALSE
	Epithelial ectoderm	bf_00021125	Chr11	16801372	16861189	Similar to Tc00.1047053511287.49: 9,11-endoperoxide prostaglandin H2 reductase (Trypanosoma cruzi (strain CL Brener) OX=353153)	-	Tc00.1047053511287.49		FALSE
	Epithelial ectoderm	bf_00021645	Chr14	5263079	5274707	Similar to atg15: Putative lipase atg15 (Chaetomium globosum (strain ATCC 6205 / CBS 148.51 / DSM 1962 / NBRC 6347 / NRRL 1970) OX=306901)	+	atg15		FALSE
	Epithelial ectoderm	bf_00023066	Chr13	10254869	10292518	Similar to drpr: Protein draper (Drosophila melanogaster OX=7227)	-	drpr		FALSE
	Epithelial ectoderm	bf_00023067	Chr13	10278445	10373729	Similar to SELE: E-selectin (Homo sapiens OX=9606)	+	SELE		FALSE
	Epithelial ectoderm	bf_00024052	Chr18	11314446	11352143	Similar to Type III intermediate filament (Tetronarce californica OX=7787)	-	Type III intermediate filament		FALSE
	Epithelial ectoderm	bf_00024356	Chr18	17492431	17523456	Similar to ngf: Nerve growth factor (Xenopus laevis OX=8355)	+	ngf	NTF3,NTF4,BDNF,NGF	FALSE
	Epithelial ectoderm	bf_00024431	Chr18	18530545	18549859	Similar to tufA: Elongation factor Tu (Vibrio parahaemolyticus serotype O3:K6 (strain RIMD 2210633) OX=223926)	-	tufA		FALSE
	Epithelial ectoderm	bf_00026335	Chr17	15801195	15821392	Similar to hibch: 3-hydroxyisobutyryl-CoA hydrolase, mitochondrial (Xenopus laevis OX=8355)	+	hibch	HIBCH	FALSE
	Epithelial ectoderm	bf_00000085	Chr3	1811539	1828762	Similar to ddl: D-alanine--D-alanine ligase (Corynebacterium efficiens (strain DSM 44549 / YS-314 / AJ 12310 / JCM 11189 / NBRC 100395) OX=196164)	+	ddl		FALSE
	Epithelial ectoderm	bf_00002349	Chr1	6339601	6366451	Similar to TPM: Tropomyosin (Branchiostoma belcheri OX=7741)	+	TPM		FALSE
	Epithelial ectoderm	bf_00002519	Chr1	9190098	9211301	Similar to GREB1L: GREB1-like protein (Homo sapiens OX=9606)	-	GREB1L	GREB1,GREB1L	FALSE
	Epithelial ectoderm	bf_00005601	Chr2	26330274	26388360	Similar to Ebf3: Transcription factor COE3 (Mus musculus OX=10090)	-	Ebf3	EBF4,EBF2,EBF1,EBF3	FALSE
	Epithelial ectoderm	bf_00007268	Chr1620	23837504	23843347	Similar to Tsta3: GDP-L-fucose synthase (Mus musculus OX=10090)	+	Tsta3		FALSE
	Epithelial ectoderm	bf_00010453	Chr8	19366143	19370353	Similar to Glutathione S-transferase A (Pleuronectes platessa OX=8262)	-	Glutathione S-transferase A		FALSE
	Epithelial ectoderm	bf_00012162	Chr7	23020407	23092163	Similar to nr6a1: Nuclear receptor subfamily 6 group A member 1 (Xenopus tropicalis OX=8364)	+	nr6a1	NR6A1	FALSE
	Epithelial ectoderm	bf_00014679	Chr12	18269355	18286350	Similar to FHL2: Four and a half LIM domains protein 2 (Bos taurus OX=9913)	+	FHL2		FALSE
	Epithelial ectoderm	bf_00017445	Chr5	18363051	18405970	Similar to CALCOCO1: Calcium-binding and coiled-coil domain-containing protein 1 (Homo sapiens OX=9606)	+	CALCOCO1		FALSE
	Epithelial ectoderm	bf_00019146	Chr15	4166577	4196644	Similar to Short neurotoxin 2 (Hemachatus haemachatus OX=8626)	-	Short neurotoxin 2		FALSE
	Epithelial ectoderm	bf_00022865	Chr13	6502821	6564774	Similar to DNAH7: Dynein heavy chain 7, axonemal (Homo sapiens OX=9606)	-	DNAH7	DNAH7	FALSE
	Epithelial ectoderm	bf_00023817	Chr18	6638575	6650381	Similar to MIMI_R571: Uncharacterized protein R571 (Acanthamoeba polyphaga mimivirus OX=212035)	+	MIMI_R571		FALSE
	Epithelial ectoderm	bf_00024051	Chr18	11299467	11310855	Similar to KRT8: Keratin, type II cytoskeletal 8 (Bos taurus OX=9913)	+	KRT8		FALSE
	Epithelial ectoderm	bf_00026105	Chr17	10940110	10995867	Similar to Cntnap2: Contactin-associated protein-like 2 (Mus musculus OX=10090)	-	Cntnap2	CNTNAP2,CNTNAP5,CNTNAP3C,CNTNAP3,CNTNAP3B,CNTNAP4	FALSE
	Mesoderm	bf_00000536	Chr3	8801200	8812341	Similar to Dll1: Delta-like protein 1 (Rattus norvegicus OX=10116)	+	Dll1	DLL1	FALSE
	Mesoderm	bf_00000966	Chr3	14635872	14698151	Similar to Nid1: Nidogen-1 (Mus musculus OX=10090)	+	Nid1	NID2,NID1	FALSE
	Mesoderm	bf_00006571	Chr1620	11424511	11442410	Similar to wnt8b: Protein Wnt-8b (Danio rerio OX=7955)	-	wnt8b	WNT8A,WNT8B	FALSE
	Mesoderm	bf_00006703	Chr1620	13815791	13882321	Similar to BICC1: Protein bicaudal C homolog 1 (Homo sapiens OX=9606)	+	BICC1	BICC1	FALSE
	Mesoderm	bf_00015832	Chr9	13482038	13523613	Similar to rbfox2: RNA binding protein fox-1 homolog 2 (Xenopus laevis OX=8355)	-	rbfox2	RBFOX3,RBFOX1	FALSE
	Mesoderm	bf_00016584	Chr5	3826692	3837854	Similar to TBX2: T-box transcription factor TBX2 (Homo sapiens OX=9606)	-	TBX2	TBX6	TRUE
	Mesoderm	bf_00020546	Chr11	6653035	6759182	Similar to Ephb1: Ephrin type-B receptor 1 (Mus musculus OX=10090)	-	Ephb1		FALSE
	Mesoderm	bf_00024911	Chr19	6795563	6880869	Similar to Sulf1: Extracellular sulfatase Sulf-1 (Mus musculus OX=10090)	+	Sulf1	SULF2,SULF1	FALSE
	Mesoderm	bf_00001015	Chr3	15301726	15326138	Similar to Ppp1r14b: Protein phosphatase 1 regulatory subunit 14B (Rattus norvegicus OX=10116)	+	Ppp1r14b	PPP1R14C,PPP1R14B,PPP1R14A	FALSE
	Mesoderm	bf_00006071	Chr1620	2217378	2348138	Similar to MIMI_R240: Collagen-like protein 4 (Acanthamoeba polyphaga mimivirus OX=212035)	+	MIMI_R240		FALSE
	Mesoderm	bf_00008625	Chr4	15130331	15224271	Similar to PDZRN3: E3 ubiquitin-protein ligase PDZRN3 (Homo sapiens OX=9606)	-	PDZRN3	PDZRN3,PDZD4,PDZRN4	FALSE
	Mesoderm	bf_00011914	Chr7	18401477	18460395	Similar to Pbx3: Pre-B-cell leukemia transcription factor 3 (Mus musculus OX=10090)	-	Pbx3	PBX1,PBX3,PBX4	TRUE
	Mesoderm	bf_00013446	Chr6	21017951	21103563	Similar to WDR49: WD repeat-containing protein 49 (Homo sapiens OX=9606)	+	WDR49		FALSE
	Mesoderm	bf_00018081	Chr10	7359624	7363417	Similar to zic4: Zinc finger protein ZIC 4 (Xenopus laevis OX=8355)	+	zic4	ZIC1,ZIC4	TRUE
	Mesoderm	bf_00020370	Chr11	3069077	3175206	Similar to Nptx1: Neuronal pentraxin-1 (Rattus norvegicus OX=10116)	+	Nptx1		FALSE
	Mesoderm	bf_00022571	Chr13	1159835	1340129	Similar to TTN: Titin (Homo sapiens OX=9606)	-	TTN		FALSE
	Mesoderm	bf_00023583	Chr18	2013894	2080670	Similar to celf2: CUGBP Elav-like family member 2 (Danio rerio OX=7955)	+	celf2	CELF1,CELF2	FALSE
	Mesoderm	bf_00000235	Chr3	4436501	4473070	Similar to Ncam1: Neural cell adhesion molecule 1 (Rattus norvegicus OX=10116)	-	Ncam1	NCAM1,NCAM2	FALSE
	Mesoderm	bf_00000406	Chr3	6938613	6958359	Similar to SRF: Serum response factor (Fragment) (Gallus gallus OX=9031)	-	SRF	SRF	TRUE
	Mesoderm	bf_00000481	Chr3	8034545	8124883	Similar to NPHS1: Nephrin (Homo sapiens OX=9606)	+	NPHS1	NPHS1	FALSE
	Mesoderm	bf_00000600	Chr3	9793325	9805930	Similar to Prox1: Prospero homeobox protein 1 (Mus musculus OX=10090)	+	Prox1	PROX1,PROX2	FALSE
	Mesoderm	bf_00001174	Chr3	17324248	17366420	Similar to Slc8a3: Sodium/calcium exchanger 3 (Rattus norvegicus OX=10116)	-	Slc8a3	SLC8A3,SLC8A2,SLC8A1	FALSE
	Mesoderm	bf_00002333	Chr1	5906034	6063880	Similar to KCNN3: Small conductance calcium-activated potassium channel protein 3 (Sus scrofa OX=9823)	+	KCNN3	KCNN4,KCNN3,KCNN1,KCNN2	FALSE
	Mesoderm	bf_00002491	Chr1	8765147	8809944	Similar to MIB1: E3 ubiquitin-protein ligase MIB1 (Homo sapiens OX=9606)	-	MIB1	MIB1	FALSE
	Mesoderm	bf_00002896	Chr1	14737792	14773511	Similar to mef2a: Myocyte-specific enhancer factor 2A homolog (Xenopus laevis OX=8355)	-	mef2a	MEF2C,MEF2D,MEF2A	TRUE
	Mesoderm	bf_00003450	Chr1	23368881	23380626	Similar to Myosin regulatory light chain 2, smooth muscle minor isoform (Gallus gallus OX=9031)	+	Myosin regulatory light chain 2, smooth muscle minor isoform		FALSE
	Mesoderm	bf_00003527	Chr1	24726146	24750837	Similar to TPM: Tropomyosin (Branchiostoma belcheri OX=7741)	+	TPM		FALSE
	Mesoderm	bf_00006200	Chr1620	4574131	4605231	Similar to Pdlim5: PDZ and LIM domain protein 5 (Mus musculus OX=10090)	-	Pdlim5	PDLIM7,PDLIM5,LDB3	FALSE
	Mesoderm	bf_00006724	Chr1620	14240847	14427976	Similar to Ank2: Ankyrin-2 (Mus musculus OX=10090)	+	Ank2	ANK2,ANK1	FALSE
	Mesoderm	bf_00007980	Chr4	5582413	5610911	Similar to Neuronal cell adhesion molecule (Gallus gallus OX=9031)	-	Neuronal cell adhesion molecule	L1CAM,NRCAM	FALSE
	Mesoderm	bf_00008073	Chr4	7020320	7054560	Similar to WNT16: Protein Wnt-16 (Homo sapiens OX=9606)	-	WNT16	WNT16	FALSE
	Mesoderm	bf_00008268	Chr4	9989324	10003248	Similar to MYH7: Myosin-7 (Canis lupus familiaris OX=9615)	+	MYH7		FALSE
	Mesoderm	bf_00009721	Chr8	7350482	7437226	Similar to RUNX1T1: Protein CBFA2T1 (Homo sapiens OX=9606)	+	RUNX1T1	CBFA2T2,CBFA2T3,RUNX1T1	FALSE
	Mesoderm	bf_00010195	Chr8	14384342	14435784	Similar to Jph3: Junctophilin-3 (Mus musculus OX=10090)	+	Jph3	JPH1	FALSE
	Mesoderm	bf_00010862	Chr7	78708	127561	Similar to BTBD8: BTB/POZ domain-containing protein 8 (Homo sapiens OX=9606)	-	BTBD8	BTBD8,KIAA1107	FALSE
	Mesoderm	bf_00012504	Chr6	4738288	4818453	Similar to PCDH9: Protocadherin-9 (Homo sapiens OX=9606)	+	PCDH9		FALSE
	Mesoderm	bf_00012971	Chr6	12056199	12182630	Similar to FREM2: FRAS1-related extracellular matrix protein 2 (Homo sapiens OX=9606)	+	FREM2	FREM3,FREM2	FALSE
	Mesoderm	bf_00014785	Chr12	20210391	20300610	Similar to MYH7: Myosin-7 (Homo sapiens OX=9606)	-	MYH7		FALSE
	Mesoderm	bf_00015807	Chr9	12951217	13041785	Similar to Tnn: Tenascin-N (Mus musculus OX=10090)	-	Tnn		FALSE
	Mesoderm	bf_00016693	Chr5	5643917	5699758	Similar to Atp2a1: Sarcoplasmic/endoplasmic reticulum calcium ATPase 1 (Mus musculus OX=10090)	+	Atp2a1	ATP2A1,ATP2A3,ATP2A2	FALSE
	Mesoderm	bf_00016793	Chr5	7418760	7456915	Similar to Cluh: Clustered mitochondria protein homolog (Mus musculus OX=10090)	+	Cluh	CLUH	FALSE
	Mesoderm	bf_00017835	Chr10	2759092	2819607	Similar to SLC6A5: Sodium- and chloride-dependent glycine transporter 2 (Homo sapiens OX=9606)	+	SLC6A5	SLC6A5	FALSE
	Mesoderm	bf_00018072	Chr10	7220114	7242559	Similar to fmr1-a: Synaptic functional regulator FMR1 (Xenopus laevis OX=8355)	-	fmr1-a		FALSE
	Mesoderm	bf_00019570	Chr15	10182709	10242843	Similar to MUSK: Muscle, skeletal receptor tyrosine-protein kinase (Homo sapiens OX=9606)	+	MUSK	MUSK	FALSE
	Mesoderm	bf_00019898	Chr15	16247972	16287424	Similar to Ptch1: Protein patched homolog 1 (Mus musculus OX=10090)	+	Ptch1	PTCH2,PTCH1	FALSE
	Mesoderm	bf_00020577	Chr11	7264224	7396328	Similar to Megf6: Multiple epidermal growth factor-like domains protein 6 (Mus musculus OX=10090)	-	Megf6		FALSE
	Mesoderm	bf_00020765	Chr11	10233241	10305153	Similar to KIF1A: Kinesin-like protein KIF1A (Homo sapiens OX=9606)	-	KIF1A	KIF1A,KIF1B	FALSE
	Mesoderm	bf_00020977	Chr11	13261792	13269559	Similar to Cd28: T-cell-specific surface glycoprotein CD28 (Mus musculus OX=10090)	-	Cd28		FALSE
	Mesoderm	bf_00022539	Chr13	162580	186826	Similar to AHNAK: Neuroblast differentiation-associated protein AHNAK (Homo sapiens OX=9606)	-	AHNAK		FALSE
	Mesoderm	bf_00022567	Chr13	817049	1100995	Similar to Ttn: Titin (Mus musculus OX=10090)	-	Ttn		FALSE
	Mesoderm	bf_00022570	Chr13	1101272	1143538	Similar to OBSCN: Obscurin (Homo sapiens OX=9606)	-	OBSCN		FALSE
	Mesoderm	bf_00022580	Chr13	1442407	1498573	Similar to ZNF160: Zinc finger protein 160 (Homo sapiens OX=9606)	-	ZNF160		TRUE
	Mesoderm	bf_00022696	Chr13	3516559	3646027	Similar to TNS: Tensin (Gallus gallus OX=9031)	+	TNS	TNS3,TNS1	FALSE
	Mesoderm	bf_00023451	Chr13	17828142	17916896	Similar to SVIL: Supervillin (Homo sapiens OX=9606)	-	SVIL	SVIL	FALSE
	Mesoderm	bf_00023874	Chr18	7705442	7741053	Similar to NEXN: Nexilin (Homo sapiens OX=9606)	-	NEXN	NEXN	FALSE
	Mesoderm	bf_00023905	Chr18	8297313	8498356	Similar to NAV3: Neuron navigator 3 (Homo sapiens OX=9606)	+	NAV3	NAV3,NAV2	FALSE
	Mesoderm	bf_00024213	Chr18	14781834	14797412	Similar to RF_0381: Putative ankyrin repeat protein RF_0381 (Rickettsia felis (strain ATCC VR-1525 / URRWXCal2) OX=315456)	+	RF_0381		FALSE
	Mesoderm	bf_00025435	Chr19	17552118	17557822	Similar to RBM38: RNA-binding protein 38 (Gallus gallus OX=9031)	+	RBM38	RBM24,RBM38	FALSE
	Mesoderm	bf_00025871	Chr17	6839592	7067051	Similar to NEB: Nebulin (Homo sapiens OX=9606)	+	NEB		FALSE
	Mesoderm	bf_00026428	Chr17	17527190	17528737	Similar to adk: Adenylate kinase (Xylella fastidiosa (strain M12) OX=405440)	-	adk		FALSE
	Mesoderm	bf_00000337	Chr3	6141497	6213387	Similar to Lama1: Laminin subunit alpha-1 (Mus musculus OX=10090)	-	Lama1		FALSE
	Mesoderm	bf_00008846	Chr4	18547989	18586827	Similar to GATA2: GATA-binding factor 2 (Gallus gallus OX=9031)	+	GATA2	GATA2,GATA3	TRUE
	Mesoderm	bf_00009295	Chr4	27710035	27744780	Similar to PODN: Podocan (Homo sapiens OX=9606)	+	PODN		FALSE
	Mesoderm	bf_00009673	Chr8	6368723	6504145	Similar to PLEKHG4B: Pleckstrin homology domain-containing family G member 4B (Homo sapiens OX=9606)	-	PLEKHG4B	PLEKHG4,PLEKHG4B	FALSE
	Mesoderm	bf_00017312	Chr5	16139441	16196153	Similar to Cblif: Cobalamin binding intrinsic factor (Mus musculus OX=10090)	-	Cblif	TCN1,CBLIF	FALSE
	Mesoderm	bf_00018253	Chr10	9956390	10046875	Similar to DOCK9: Dedicator of cytokinesis protein 9 (Homo sapiens OX=9606)	+	DOCK9	DOCK9,DOCK11,DOCK10	FALSE
	Mesoderm	bf_00024543	Chr19	64877	91730	Similar to gata4: Transcription factor GATA-4 (Xenopus laevis OX=8355)	-	gata4	GATA4,GATA5,GATA6	TRUE
	Mesoderm	bf_00016019	Chr9	16953578	17009745	Similar to DGKE: Diacylglycerol kinase epsilon (Homo sapiens OX=9606)	+	DGKE	DGKE	FALSE
	Neural ectoderm	bf_00008183	Chr4	8456603	8491451	Similar to LRIG3: Leucine-rich repeats and immunoglobulin-like domains protein 3 (Homo sapiens OX=9606)	-	LRIG3	LRIG3	FALSE
	Neural ectoderm	bf_00003158	Chr1	18495182	18510223	Similar to fan1: Fanconi-associated nuclease 1 (Danio rerio OX=7955)	-	fan1	FAN1	FALSE
	Neural ectoderm	bf_00006040	Chr1620	1016906	1117146	Similar to CAMK2D: Calcium/calmodulin-dependent protein kinase type II subunit delta (Bos taurus OX=9913)	+	CAMK2D	CAMK2G,CAMK2B,CAMK2D,CAMK2A	FALSE
	Neural ectoderm	bf_00006728	Chr1620	14573521	14652569	Similar to PAX2: Paired box protein Pax-2 (Homo sapiens OX=9606)	+	PAX2	PAX8,PAX5,PAX2	TRUE
	Neural ectoderm	bf_00006817	Chr1620	16225534	16450502	Similar to celf4: CUGBP Elav-like family member 4 (Danio rerio OX=7955)	+	celf4	CELF3,CELF6,CELF4,CELF5	FALSE
	Neural ectoderm	bf_00012371	Chr6	2321853	2359269	Similar to slc6a9: Sodium- and chloride-dependent glycine transporter 1 (Xenopus laevis OX=8355)	+	slc6a9		FALSE
	Neural ectoderm	bf_00016728	Chr5	6413892	6534108	Similar to SRRM2: Serine/arginine repetitive matrix protein 2 (Homo sapiens OX=9606)	-	SRRM2		FALSE
	Neural ectoderm	bf_00019348	Chr15	7255690	7271594	Similar to elavl2: ELAV-like protein 2 (Xenopus tropicalis OX=8364)	+	elavl2	ELAVL3,ELAVL4,ELAVL2,ELAVL1	FALSE
	Neural ectoderm	bf_00020577	Chr11	7264224	7396328	Similar to Megf6: Multiple epidermal growth factor-like domains protein 6 (Mus musculus OX=10090)	-	Megf6		FALSE
	Notochord	bf_00000777	Chr3	12107369	12143132	Similar to CRIM1: Cysteine-rich motor neuron 1 protein (Gallus gallus OX=9031)	-	CRIM1	CRIM1	FALSE
	Notochord	bf_00005229	Chr2	19989364	19994245	Similar to fgf8a: Fibroblast growth factor 8 (Danio rerio OX=7955)	-	fgf8a	FGF8,FGF17,FGF18	FALSE
	Notochord	bf_00013755	Chr12	1551562	1890172	Similar to DMD: Dystrophin (Gallus gallus OX=9031)	-	DMD	DMD,UTRN	FALSE
	Notochord	bf_00003149	Chr1	18302878	18352494	Similar to FBN2: Fibrillin-2 (Homo sapiens OX=9606)	-	FBN2	FBN3,FBN2,FBN1	FALSE
	Notochord	bf_00005353	Chr2	21691391	21770216	Similar to SLIT2: Slit homolog 2 protein (Homo sapiens OX=9606)	-	SLIT2	SLIT3,SLIT2	FALSE
	Notochord	bf_00006726	Chr1620	14447124	14496304	Similar to MSANTD4: Myb/SANT-like DNA-binding domain-containing protein 4 (Bos taurus OX=9913)	+	MSANTD4		FALSE
	Notochord	bf_00008041	Chr4	6387859	6472251	Similar to CELSR2: Cadherin EGF LAG seven-pass G-type receptor 2 (Homo sapiens OX=9606)	-	CELSR2	CELSR3,CELSR1,CELSR2	FALSE
	Notochord	bf_00009182	Chr4	25373036	25481204	Similar to Flnc: Filamin-C (Rattus norvegicus OX=10116)	-	Flnc	FLNB,FLNA,FLNC	FALSE
	Notochord	bf_00010361	Chr8	17883211	17908753	Similar to Sall1: Sal-like protein 1 (Mus musculus OX=10090)	-	Sall1	SALL4,SALL3,SALL1	TRUE
	Notochord	bf_00011569	Chr7	12438772	12522558	Similar to Col11a1: Collagen alpha-1(XI) chain (Mus musculus OX=10090)	-	Col11a1	COL5A1,COL11A1,COL5A3	FALSE
	Notochord	bf_00012971	Chr6	12056199	12182630	Similar to FREM2: FRAS1-related extracellular matrix protein 2 (Homo sapiens OX=9606)	+	FREM2	FREM3,FREM2	FALSE
	Notochord	bf_00014729	Chr12	19195812	19233909	Similar to SIM1: Single-minded homolog 1 (Pan troglodytes OX=9598)	-	SIM1	SIM2,SIM1	FALSE
	Notochord	bf_00015444	Chr9	7425940	7493732	Similar to Myh10: Myosin-10 (Mus musculus OX=10090)	+	Myh10	MYH9,MYH10,MYH14,MYH11	FALSE
	Notochord	bf_00015876	Chr9	14489229	14508398	Similar to Ntn1: Netrin-1 (Mus musculus OX=10090)	+	Ntn1	NTN1	FALSE
	Notochord	bf_00018029	Chr10	6511792	6580394	Similar to lhfpl6: LHFPL tetraspan subfamily member 6 protein (Danio rerio OX=7955)	+	lhfpl6	LHFPL1,LHFPL6	FALSE
	Notochord	bf_00019893	Chr15	16121564	16168946	Similar to SYDE2: Rho GTPase-activating protein SYDE2 (Homo sapiens OX=9606)	-	SYDE2	SYDE1,SYDE2	FALSE
	Notochord	bf_00019946	Chr15	16926783	16981182	Similar to CG11837: Probable dimethyladenosine transferase (Drosophila melanogaster OX=7227)	-	CG11837	DIMT1	FALSE
	Notochord	bf_00021432	Chr14	1381123	1530243	Similar to Rbms1: RNA-binding motif, single-stranded-interacting protein 1 (Mus musculus OX=10090)	-	Rbms1	RBMS1,RBMS3,RBMS2	FALSE
	Notochord	bf_00022566	Chr13	693489	779266	Similar to MYLK: Myosin light chain kinase, smooth muscle (Oryctolagus cuniculus OX=9986)	-	MYLK	MYLK	FALSE
	Notochord	bf_00023110	Chr13	11161551	11281551	Similar to Col18a1: Collagen alpha-1(XVIII) chain (Mus musculus OX=10090)	-	Col18a1	COL18A1,COL15A1	FALSE
	Notochord	bf_00023885	Chr18	7923344	7958804	Similar to THSD7A: Thrombospondin type-1 domain-containing protein 7A (Homo sapiens OX=9606)	-	THSD7A		FALSE
	Notochord	bf_00023905	Chr18	8297313	8498356	Similar to NAV3: Neuron navigator 3 (Homo sapiens OX=9606)	+	NAV3	NAV3,NAV2	FALSE
	Notochord	bf_00025952	Chr17	8429831	8489772	Similar to ZEB2: Zinc finger E-box-binding homeobox 2 (Homo sapiens OX=9606)	-	ZEB2	ZEB1,ZEB2	TRUE
	Notochord	bf_00025975	Chr17	8778636	8801854	Similar to shha: Sonic hedgehog protein A (Danio rerio OX=7955)	-	shha	IHH,SHH	FALSE
	Notochord	bf_00026268	Chr17	14403531	14448366	Similar to col2a1: Collagen alpha-1(II) chain (Xenopus laevis OX=8355)	-	col2a1	COL1A2,COL2A1,COL1A1,COL3A1,COL5A2	FALSE
