# Supplementary material for: Joint profiling of gene expression and chromatin accessibility of amphioxus development at single cell resolution
Source: Research Square preprint supplement (doi:10.21203/rs.3.rs-504113/v1), 2021-05-18
Supplement: Supplementary file 11 [file f089d0ccb0a7de7257d7151a.xlsx]

## Sheet: scRNA-seq (embryos)
	Supplementary Table 7. Data summary of adult amphioxus tissue single cell RNA-sequencing.
	tissue_name	n_cells	min_counts_per_cell	median_counts_per_cell	mean_counts_per_cell	max_counts_per_cell	min_genes_per_cell	median_genes_per_cell	mean_genes_per_cell	max_genes_per_cell	qc_min_genes	qc_max_genes
	Tentacles	11024	105	267	405.574	8317	100	164	164	2540	100	3000
	Neural Tube	13561	104	242	389.574	15060	100	175	175	2985	100	3000
	Male Gonad	8212	102	184	270.981	7984	100	142	142	2205	100	3000
	Endostyle	5274	107	434	834.679	17259	100	219	219	2939	100	3000
	Epidermis	23549	106	354	493.322	11971	100	147	147	2730	100	3000
	Anterior	6629	111	342	553.753	6864	100	184	184	2725	100	3000
	Anterior Intestine	32111	104	206	327.2	10116	100	144	144	2961	100	3000
	Gill Slits	23349	104	379	695.971	18474	100	185	185	2992	100	3000
	Posterior Intestine	12438	105	251	407.909	18618	100	148	148	2896	100	3000
	Rostral End	3811	112	450	776.787	17249	100	206	206	2758	100	3000
	Female Gonad	91383	102	294	550.365	17808	100	198	198	2999	100	3000
	Muscle	873	112	263	345.536	2401	100	139	139	813	100	3000
	Notochord	2837	110	276	366.557	4738	100	145	145	1182	100	3000
