# Supplementary material for: Joint profiling of gene expression and chromatin accessibility of amphioxus development at single cell resolution
Source: Research Square preprint supplement (doi:10.21203/rs.3.rs-504113/v1), 2021-05-18
Supplement: Supplementary file 12 [file f8ffb06d41f855179d465ce7.xlsx]

## Sheet: sheet1
	Supplementary Table 5. Primers used to clone the new lineage-specific genes for ISH.
	Lineage	ISH Tested Markers	Cloning Primers_Forward	Cloning Primers_Reverse
	Endoderm	BfHmcn	GCACAACGACGAAACAGCTT	GAACAGTCCGTGAGACAGCA
	Epithelial ectoderm	BfGreb1	GACCCACTAGGGGAGACCAT	TACGCTGACTGCACTTCGTT
	Epithelial ectoderm	BfTsta3	TTCTGGTGACCGGAGGATCT	GTAATGCTGGGACAGCCAGT
	Epithelial ectoderm	BfRbr	ACAACCAAACATGGGCGTTC	CAGTCACCGTGATCTCCAGT
	Epithelial ectoderm	BfLac	ACTAAACTGGATGCGTGGGG	GTCAAATCCCAGTCGTCGGT
	Endoderm	BfC6	CTCCCTGGTCCACATGTTCC	ATGGGTTCAGTCCGCTTCTG
	Endoderm	BfMini_l256	CTCTCCGGAAATCTCCTCGC	CGAACATCATGGCTTGCTCG
	Endoderm	BfSlc6a15	GAATGCGAGAAGTCCTCCCC	TCAGGAAGCAGACGACACAC
	Neural ectoderm	BfAlcam	TGCAGACTATGAGGAGGGCT	GAGGACGCCACACACTTGTA
	Notochord	BfSlit3	TCACTCCGGTCATCATCCCT	CTTGTCACAGTCGCAGGAGT
	Notochord	BfCol11a1	TTCGGTGGATTTACCACGGG	CCGTTGCTGTTGCCATCAAA
	Notochord	BfRbms1	AGCAGCTCAGCAAGACCAAT	ATGATGCACGTACGGGTTGT
	Notochord	BfCreb3l2	GCGGACCAATGTCACCAAAC	AGCGGTTTGTCTGTCTCGTT
	Epithelial ectoderm	BfMlp	CTTCTCCGTGTATCCCGACG	TGTCAGCACCCGTAGAACAC
